# Supplementary material for: Chromatin maturation of the HIV-1 provirus in primary resting CD4+ T cells
Source: PLoS Pathog. 2020 Jan 30;16(1):e1008264. doi: 10.1371/journal.ppat.1008264 (PMC6991963; doi:10.1371/journal.ppat.1008264)
Supplement: S2 Table — Quantification of sequencing reads overlapping 40,147 probes designed around the 5´ region of genes in the GRCh37 assembly. (XLSX) [file ppat.1008264.s009.xlsx]

## Sheet: S2 Table
gene	chr	start of 2kb probe	end of 2 kb probe	strand	H3K27ac_active	H3K27ac_resting	input_active	input_resting
MIR1302-11	1	28804	30804	+	15.7622	14.5786	8.303	3.81859
MIR1302-11	1	29616	31616	+	2.09387	2.20712	2.97655	1.81616
FAM138A	1	34831	36831	-	1.1051	0.696986	0.313321	0.74509
OR4F5	1	68341	70341	+	0.814281	0.638904	1.87992	1.21077
RP11-34P13.8	1	89855	91855	-	0.348977	0.813151	0.548311	0.651954
RP11-34P13.7	1	132316	134316	-	0.348977	0.638904	0.704972	0.931363
RP11-34P13.14	1	139089	141089	-	0.639792	0.696986	0.704972	0.605386
RP11-34P13.12	1	148457	150457	-	0.639792	0.638904	0.626642	0.791658
U6	1	156637	158637	-	0.639792	0.52274	0.391651	1.0245
RP11-34P13.9	1	159696	161696	+	0.872444	0.638904	0.704972	0.651954
RP11-34P13.13	1	172614	174614	-	1.1051	0.987398	1.09662	0.74509
AP006222.2	1	266003	268003	-	0.639792	0.813151	0.391651	0.698522
RP4-669L17.11	1	317061	319061	+	0.348977	0.406575	0.469981	0.419113
RP4-669L17.10	1	319412	321412	+	0.465303	0.52274	0.861632	0.651954
OR4F29	1	366890	368890	+	0.40714	0.290411	0.626642	0.372545
RP5-857K21.15	1	458906	460906	+	0.40714	0.638904	0.313321	0.419113
RP4-669L17.2	1	459230	461230	-	0.639792	0.755069	0.313321	0.419113
RP5-857K21.2	1	522259	524259	+	0.174489	0.755069	0.313321	0.512249
RP5-857K21.1	1	522583	524583	-	0.348977	0.755069	0.15666	0.419113
RP5-857K21.3	1	529083	531083	+	0.232652	0.348493	0.469981	0.372545
RP5-857K21.5	1	563140	565140	-	9.36423	5.16932	48.2514	34.6001
AC114498.7	1	563700	565700	-	13.4356	7.66685	71.3588	50.6196
AC114498.2	1	564202	566202	+	20.0662	13.1266	106.451	74.2762
AC114498.8	1	564955	566955	-	22.4509	15.2175	118.122	82.7516
hsa-mir-1977	1	565015	567015	-	21.404	14.6948	113.5	78.7467
AC114498.3	1	565029	567029	-	21.404	14.7529	113.5	78.7467
AC114498.4	1	565191	567191	-	19.1356	13.5912	103.239	71.1561
AC114498.5	1	566817	568817	-	16.1111	10.5129	82.0117	59.6072
AC114498.1	1	567319	569319	+	17.5652	12.1392	93.1346	68.3154
AC114498.6	1	568094	570094	+	18.205	13.0685	91.4897	62.9135
OR4F16	1	620803	622803	-	0.290815	0.580822	0.626642	0.558818
RP5-857K21.4	1	658680	660680	-	0.40714	0.406575	0.548311	0.74509
RP11-206L10.3	1	684146	686146	-	0.581629	0.871233	0.626642	0.838226
U6	1	692466	694466	-	0.639792	1.04548	0.783302	0.74509
RP11-206L10.4	1	695541	697541	+	0.348977	0.696986	1.01829	0.977931
RP11-206L10.5	1	699055	701055	-	0.465303	1.27781	1.01829	0.791658
RP11-206L10.2	1	712756	714756	-	4.88568	4.29808	2.42824	1.58332
RP11-206L10.6	1	713412	715412	+	5.00201	5.28548	2.50657	1.35048
RP11-206L10.7	1	716575	718575	+	0.98877	1.16164	1.01829	1.11764
AL669831.1	1	720570	722570	+	0.523466	0.987398	0.548311	1.21077
RP11-206L10.9	1	739429	741429	+	2.0357	2.14904	1.25328	0.977931
RP11-206L10.8	1	744291	746291	-	1.22142	1.04548	0.939963	1.0245
RP11-206L10.10	1	751842	753842	-	1.22142	1.21973	0.783302	0.977931
FAM87B	1	752001	754001	+	1.22142	1.10356	0.861632	0.884795
LINC00115	1	761652	763652	-	7.15404	6.56329	4.9348	1.81616
RP11-206L10.11	1	762238	764238	+	6.63057	6.09863	4.30816	2.09557
AL669831.2	1	807707	809707	-	0.756118	0.696986	0.548311	0.651954
FAM41C	1	811033	813033	-	1.1051	0.871233	0.626642	0.605386
RP11-54O7.1	1	846065	848065	+	0.523466	0.290411	1.01829	0.419113
RP11-54O7.2	1	848801	850801	+	0.523466	0.232329	0.548311	0.465681
RP11-54O7.3	1	853822	855822	-	0.465303	0.348493	0.548311	0.512249
SAMD11	1	859510	861510	+	2.61733	0.929315	2.50657	1.53675
NOC2L	1	893439	895439	-	3.43161	3.13644	3.99484	1.62988
KLHL17	1	895217	897217	+	6.97955	5.80822	3.68152	1.30391
PLEKHN1	1	901127	903127	+	2.61733	2.14904	3.3682	1.21077
C1orf170	1	916247	918247	-	0.930607	0.638904	0.861632	0.651954
HES4	1	934302	936302	-	9.53872	7.08603	5.87477	2.88722
RP11-54O7.11	1	947323	949323	-	3.31529	3.48493	1.48827	1.86273
ISG15	1	948053	950053	+	3.78059	3.65918	1.72326	1.76959
AGRN	1	954753	956753	+	12.6214	7.4926	4.30816	1.86273
RP11-54O7.14	1	989663	991663	+	0.40714	0.406575	1.25328	0.791658
RNF223	1	1008437	1010437	-	0.697955	0.580822	1.17495	0.931363
C1orf159	1	1050491	1052491	-	5.6418	4.58849	5.9531	2.28184
RP11-465B22.5	1	1071647	1073647	+	1.80305	2.09096	2.11492	1.07107
MIR200B	1	1101734	1103734	+	0.98877	0.929315	1.33161	1.07107
MIR200A	1	1102493	1104493	+	0.581629	0.755069	1.17495	1.0245
MIR429	1	1103635	1105635	+	0.581629	0.406575	0.704972	0.931363
TTLL10	1	1108514	1110514	+	1.16326	0.929315	1.17495	0.838226
RP11-465B22.6	1	1113685	1115685	-	0.639792	0.638904	1.01829	0.838226
TNFRSF18	1	1140821	1142821	-	1.80305	1.39397	1.25328	1.1642
TNFRSF4	1	1148268	1150268	-	2.26835	2.20712	1.25328	0.977931
SDF4	1	1166161	1168161	-	15.704	12.1392	4.22983	2.049
B3GALT6	1	1166879	1168879	+	15.6458	11.7907	4.85647	2.37497
FAM132A	1	1180852	1182852	-	1.22142	1.33589	1.80159	1.25734
UBE2J2	1	1208015	1210015	-	13.6683	9.75781	4.69981	2.70095
RP5-902P8.10	1	1209853	1211853	+	1.1051	1.04548	0.861632	0.605386
SCNN1D	1	1213697	1215697	+	0.523466	0.929315	0.391651	0.558818
PUSL1	1	1243197	1245197	+	11.6326	7.20219	5.79643	3.02693
ACAP3	1	1243739	1245739	-	7.09588	5.34356	4.30816	2.28184
RP5-890O3.9	1	1252819	1254819	-	0.523466	0.464658	0.626642	0.651954
CPSF3L	1	1258821	1260821	-	9.07342	7.55069	6.03143	2.46811
GLTPD1	1	1259386	1261386	+	9.59688	7.55069	5.87477	2.46811
TAS1R3	1	1265944	1267944	+	0.930607	0.696986	1.17495	0.838226
DVL1	1	1283510	1285510	-	12.0397	8.01534	4.30816	1.53675
MXRA8	1	1295907	1297907	-	0.697955	0.696986	1.01829	0.605386
AURKAIP1	1	1309625	1311625	-	8.7826	6.73754	4.22983	1.86273
CCNL2	1	1333458	1335458	-	11.3999	10.629	4.9348	2.42154
RP4-758J18.2	1	1334152	1336152	+	10.6438	10.4548	5.24812	2.28184
RP4-758J18.3	1	1335049	1337049	+	2.67549	3.65918	1.87992	1.1642
RP4-758J18.5	1	1337955	1339955	-	1.04693	0.406575	0.626642	0.651954
MRPL20	1	1341443	1343443	-	10.4693	7.95726	4.54315	1.95586
RP4-758J18.7	1	1354875	1356875	+	1.97754	1.33589	0.939963	1.21077
ANKRD65	1	1355899	1357899	-	1.16326	1.04548	0.704972	0.791658
TMEM88B	1	1360806	1362806	+	1.22142	0.929315	1.33161	0.931363
RP4-758J18.8	1	1361929	1363929	-	1.5704	1.6263	2.03659	0.931363
AL391244.1	1	1362752	1364752	+	1.39591	1.45206	1.80159	0.977931
RP4-758J18.9	1	1364385	1366385	-	0.639792	0.406575	1.17495	0.698522
RP4-758J18.10	1	1368703	1370703	-	1.68672	0.929315	0.391651	0.74509
VWA1	1	1369491	1371491	+	2.73366	1.39397	2.19325	1.30391
ATAD3C	1	1384319	1386319	+	0.174489	0.348493	0.391651	0.465681
ATAD3B	1	1406393	1408393	+	6.57241	5.45973	3.21154	1.67645
ATAD3A	1	1446781	1448781	+	13.6683	10.8614	5.01313	1.76959
C1orf70	1	1474583	1476583	-	2.0357	1.16164	2.50657	1.07107
SSU72	1	1508999	1510999	-	15.9948	11.8488	4.54315	2.56125
AL645728.1	1	1509605	1511605	+	14.9479	11.4422	4.07317	2.14213
RP11-345P4.5	1	1534226	1536226	-	6.04894	3.77534	3.52486	1.67645
AL691432.1	1	1535069	1537069	+	5.23466	3.31069	2.27158	1.21077
MIB2	1	1550045	1552045	+	14.7152	12.3134	6.97139	2.74752
MMP23B	1	1566724	1568724	+	2.50101	2.6137	3.28987	1.62988
SLC35E2B	1	1622917	1624917	-	12.6795	9.23507	5.32645	2.14213
CDK11A	1	1654716	1656716	-	3.95508	4.64658	2.97655	1.35048
RP1-283E3.3	1	1655304	1657304	+	4.0714	4.06575	2.97655	1.58332
RP1-283E3.8	1	1663243	1665243	+	0.98877	1.04548	0.469981	0.512249
SLC35E2	1	1676181	1678181	-	13.6101	11.2099	6.89306	2.51468
NADK	1	1710646	1712646	-	4.59487	5.57589	2.66323	1.67645
GNB1	1	1821252	1823252	-	27.5111	20.0964	6.42308	3.77202
RP1-140A9.1	1	1822160	1824160	+	16.9836	11.0356	5.01313	2.74752
CALML6	1	1845516	1847516	+	0.40714	0.174247	0.783302	0.651954
TMEM52	1	1849462	1851462	-	2.61733	1.45206	3.91651	1.30391
C1orf222	1	1934026	1936026	-	0.814281	0.638904	1.33161	0.838226
RP11-547D24.1	1	1945719	1947719	-	0.639792	0.464658	0.391651	0.74509
GABRD	1	1950030	1952030	+	0.98877	0.696986	1.48827	1.11764
RP11-547D24.3	1	1980259	1982259	-	3.43161	1.68438	2.19325	1.53675
PRKCZ	1	1981159	1983159	+	3.54794	1.6263	3.52486	2.049
RP11-181G12.2	1	2114578	2116578	-	0.465303	0.348493	0.626642	0.558818
RP11-181G12.5	1	2142763	2144763	-	0.98877	1.56822	1.01829	1.21077
C1orf86	1	2142909	2144909	-	1.1051	1.6263	0.939963	1.30391
AL590822.1	1	2144370	2146370	-	0.756118	0.987398	0.861632	0.791658
RP11-181G12.4	1	2150925	2152925	-	0.581629	0.464658	0.548311	0.605386
SKI	1	2159384	2161384	+	3.95508	2.03288	1.87992	1.11764
MORN1	1	2321896	2323896	-	15.1224	11.2679	5.09146	2.28184
RER1	1	2322517	2324517	+	14.5989	11.0356	5.32645	2.28184
PEX10	1	2343986	2345986	-	6.16527	4.58849	3.60319	2.23527
RP4-740C4.4	1	2356669	2358669	+	0.523466	0.638904	0.626642	0.791658
PLCH2	1	2398148	2400148	+	0.639792	0.290411	0.783302	0.605386
RP3-395M20.2	1	2423447	2425447	-	0.581629	0.348493	0.469981	0.605386
RP3-395M20.3	1	2424668	2426668	-	0.465303	0.52274	0.704972	0.791658
PANK4	1	2456789	2458789	-	6.68874	3.31069	3.05488	1.67645
HES5	1	2460434	2462434	-	3.54794	3.07836	2.66323	1.30391
TNFRSF14	1	2486328	2488328	+	5.69997	8.01534	2.03659	1.30391
RP3-395M20.8	1	2487220	2489220	-	5.69997	8.71233	2.34991	1.58332
RP3-395M20.7	1	2497099	2499099	+	0.697955	0.871233	0.548311	0.558818
RP3-395M20.9	1	2512249	2514249	+	1.22142	2.09096	0.939963	0.791658
C1orf93	1	2517180	2519180	+	7.61934	9.11891	4.85647	2.09557
MMEL1	1	2563231	2565231	-	0.40714	0.406575	0.234991	0.931363
RP13-436F16.1	1	2563257	2565257	+	0.40714	0.406575	0.234991	0.931363
TTC34	1	2705030	2707030	-	1.04693	0.348493	0.626642	1.0245
RP11-740P5.2	1	2728007	2730007	-	0.523466	0.638904	0.626642	0.512249
RP11-740P5.3	1	2730313	2732313	-	0.290815	0.464658	0.469981	0.512249
ACTRT2	1	2937296	2939296	+	0.40714	0.580822	0.469981	0.558818
RP1-163G9.1	1	2983751	2985751	-	0.639792	1.16164	2.11492	1.0245
PRDM16	1	2984982	2986982	+	1.5704	1.74247	1.40994	1.76959
RP1-163G9.2	1	3049023	3051023	-	0.232652	0.580822	0.313321	0.512249
ARHGEF16	1	3370240	3372240	+	1.27958	0.871233	2.27158	0.838226
MIR551A	1	3476104	3478104	-	0.523466	0.348493	0.626642	0.512249
MEGF6	1	3526809	3528809	-	1.45407	0.813151	2.27158	1.07107
RP11-46F15.2	1	3540057	3542057	-	6.57241	4.35617	2.50657	1.58332
TPRG1L	1	3540816	3542816	+	6.7469	4.93699	2.5849	1.95586
WRAP73	1	3568075	3570075	-	13.203	11.6164	5.32645	2.00243
TP73	1	3568334	3570334	+	12.9703	11.326	4.85647	1.86273
RP5-1092A11.5	1	3584086	3586086	-	3.89692	4.87891	1.33161	1.0245
RP5-1092A11.2	1	3629612	3631612	-	0.697955	0.348493	0.861632	0.325977
RP5-1092A11.3	1	3653189	3655189	-	0.40714	0.290411	0.783302	0.558818
TP73-AS1	1	3662650	3664650	-	3.83875	3.42685	2.81989	1.07107
CCDC27	1	3668212	3670212	+	0.40714	0.638904	0.234991	0.279409
RP1-286D6.2	1	3688602	3690602	+	4.36222	2.38137	4.1515	1.81616
LRRC47	1	3711818	3713818	-	7.91016	7.60877	3.44653	1.76959
CEP104	1	3772528	3774528	-	7.67751	4.99507	3.05488	2.42154
DFFB	1	3773095	3775095	+	7.32853	4.58849	3.21154	2.23527
C1orf174	1	3815607	3817607	-	4.94385	4.76274	3.13321	1.72302
RP13-15E13.1	1	3816186	3818186	+	6.16527	6.27288	3.83818	2.09557
RP13-614K11.1	1	3999923	4001923	+	0.40714	0.348493	0.548311	0.651954
RP13-614K11.2	1	4007790	4009790	-	0.290815	0.290411	0.548311	0.651954
RP5-1166F10.1	1	4471361	4473361	+	0.639792	0.348493	0.313321	0.605386
RP1-37J18.1	1	4611045	4613045	+	0.290815	0.406575	0.469981	0.512249
RP1-37J18.2	1	4630858	4632858	+	0.290815	0.406575	0.234991	0.698522
AJAP1	1	4714042	4716042	+	0.697955	0.406575	0.783302	1.0245
RP11-542C10.1	1	5149709	5151709	-	0.290815	0.348493	1.01829	0.605386
RP11-154H17.1	1	5727105	5729105	-	0.872444	0.52274	0.391651	0.977931
MIR548W	1	5875181	5877181	+	0.40714	0.638904	0.548311	0.605386
KCNAB2	1	6050776	6052776	+	7.96832	6.27288	4.62148	2.1887
NPHP4	1	6051283	6053283	-	9.71321	8.48	5.40478	2.60782
CHD5	1	6238933	6240933	-	1.86121	1.21973	1.87992	1.35048
RP1-120G22.11	1	6264590	6266590	-	2.79182	3.13644	2.11492	1.62988
RNF207	1	6264785	6266785	+	3.02447	3.2526	2.5849	1.76959
RPL22	1	6268199	6270199	-	1.5704	1.10356	2.11492	1.35048
ICMT	1	6294782	6296782	-	11.1091	9.17699	3.05488	1.58332
LINC00337	1	6295550	6297550	+	9.77137	7.89918	3.05488	1.90929
HES3	1	6303502	6305502	+	1.04693	0.52274	1.5666	0.977931
GPR153	1	6319785	6321785	-	3.66426	2.96219	4.07317	1.62988
ACOT7	1	6453201	6455201	-	8.7826	7.78302	3.68152	2.37497
HES2	1	6483480	6485480	-	1.68672	1.33589	2.66323	1.0245
ESPN	1	6484098	6486098	+	1.68672	1.33589	2.5849	1.0245
RP1-202O8.2	1	6505816	6507816	-	1.33775	0.813151	1.33161	1.07107
TNFRSF25	1	6525005	6527005	-	1.16326	0.871233	1.72326	1.07107
PLEKHG5	1	6578871	6580871	-	0.581629	0.696986	0.548311	0.884795
U6	1	6600164	6602164	+	0.465303	0.755069	0.783302	0.651954
NOL9	1	6613345	6615345	-	8.60811	7.08603	2.81989	1.86273
TAS1R1	1	6614491	6616491	+	3.6061	3.54301	1.80159	1.39704
ZBTB48	1	6639311	6641311	+	4.53671	4.12384	2.42824	1.67645
PHF13	1	6672995	6674995	+	18.2632	13.0104	6.81473	3.0735
KLHL21	1	6673417	6675417	-	17.6815	12.7781	6.42308	3.30634
THAP3	1	6684176	6686176	+	7.44485	6.38904	2.50657	1.58332
DNAJC11	1	6760734	6762734	-	5.58364	4.41425	3.3682	2.70095
RP11-242F24.1	1	6783947	6785947	+	0.697955	1.10356	0.783302	0.558818
snoU13	1	6812029	6814029	+	0.697955	0.755069	0.469981	0.931363
RP11-312B8.1	1	6843653	6845653	-	12.6795	9.87398	4.38649	1.95586
CAMTA1	1	6844634	6846634	+	14.7152	9.99014	4.69981	2.14213
RP11-334N17.1	1	7073089	7075089	-	0.348977	0.464658	0.313321	0.325977
U1	1	7278670	7280670	+	0.465303	0.174247	0.939963	0.279409
CAMTA1-IT1	1	7428253	7430253	+	0.639792	0.232329	0.313321	0.791658
RP3-453P22.2	1	7448564	7450564	-	0.581629	0.464658	0.939963	0.512249
RP4-549F15.1	1	7500364	7502364	-	0.581629	0.232329	0.313321	0.325977
VAMP3	1	7830579	7832579	+	7.50302	5.05315	3.05488	1.58332
PER3	1	7843630	7845630	+	4.0714	2.78795	4.9348	1.95586
RP3-467L1.4	1	7886152	7888152	-	0.465303	0.52274	0.548311	0.977931
UTS2	1	7912322	7914322	-	0.348977	0.696986	0.626642	0.558818
AL009183.1	1	7989158	7991158	-	0.523466	1.45206	0.939963	0.884795
TNFRSF9	1	7999676	8001676	-	1.16326	1.45206	0.939963	1.21077
PARK7	1	8013601	8015601	+	3.02447	3.19452	2.42824	1.21077
Y_RNA	1	8041793	8043793	-	0.814281	1.21973	0.861632	0.698522
ERRFI1-IT1	1	8065534	8067534	-	0.523466	0.52274	0.548311	0.512249
ERRFI1	1	8085118	8087118	-	4.7112	3.07836	3.75985	2.09557
RP11-431K24.1	1	8086048	8088048	+	2.96631	2.20712	2.97655	1.67645
U1	1	8265407	8267407	-	0.523466	1.21973	0.469981	0.419113
RP11-431K24.3	1	8267982	8269982	+	0.581629	0.755069	0.704972	0.419113
RP11-431K24.4	1	8279339	8281339	-	0.465303	0.871233	0.313321	0.605386
U6	1	8351073	8353073	-	0.872444	0.580822	0.469981	0.791658
SLC45A1	1	8377136	8379136	+	2.0357	0.871233	1.87992	1.25734
Y_RNA	1	8387377	8389377	+	0.639792	0.464658	0.313321	0.465681
RP5-1115A15.1	1	8483955	8485955	+	5.87445	5.34356	2.11492	1.25734
SNORA77	1	8570728	8572728	-	2.67549	2.20712	0.939963	0.977931
Y_RNA	1	8855481	8857481	-	0.930607	1.16164	0.939963	1.07107
RP4-633I8.4	1	8865169	8867169	+	0.930607	0.755069	0.548311	0.512249
RERE	1	8876452	8878452	-	13.9009	13.1266	5.40478	3.02693
ENO1-IT1	1	8936816	8938816	-	8.54995	11.5584	3.28987	1.53675
ENO1	1	8938058	8940058	-	12.2724	11.9649	5.32645	1.95586
ENO1-AS1	1	8938144	8940144	+	12.4469	11.9069	5.32645	2.049
U6	1	8942342	8944342	-	0.639792	0.696986	0.391651	0.419113
CA6	1	9005172	9007172	+	0.756118	0.755069	0.861632	0.791658
SLC2A7	1	9085154	9087154	-	0.523466	0.638904	0.626642	0.419113
SCARNA16	1	9142005	9144005	+	1.45407	1.85863	0.939963	0.651954
SLC2A5	1	9147287	9149287	-	0.581629	0.813151	1.01829	0.605386
GPR157	1	9188000	9190000	-	8.25913	5.69206	3.75985	1.44361
MIR34A	1	9210586	9212586	-	0.697955	1.21973	0.704972	0.651954
RP3-510D11.2	1	9241521	9243521	+	8.25913	8.18959	4.30816	2.23527
RP3-510D11.1	1	9261428	9263428	-	0.756118	0.52274	1.01829	1.25734
H6PD	1	9294113	9296113	+	13.1448	8.07343	3.28987	3.0735
Z98044.1	1	9337700	9339700	+	1.1051	0.929315	0.704972	0.372545
SPSB1	1	9352189	9354189	+	7.67751	4.47233	4.1515	2.00243
RN5S40	1	9496587	9498587	-	0.40714	0.580822	0.861632	0.232841
RP13-392I16.1	1	9562280	9564280	-	0.639792	1.16164	0.939963	1.0245
SLC25A33	1	9598791	9600791	+	9.01525	8.18959	3.52486	2.60782
TMEM201	1	9648182	9650182	+	8.95709	6.91178	2.34991	1.58332
PIK3CD	1	9711040	9713040	+	13.0867	12.4877	5.01313	2.28184
C1orf200	1	9713394	9715394	-	4.30406	6.44712	1.09662	1.53675
RP11-558F24.4	1	9746382	9748382	-	3.43161	4.58849	2.19325	1.21077
CLSTN1	1	9883334	9885334	-	12.9703	7.89918	3.83818	2.00243
RP11-84A14.5	1	9907626	9909626	+	0.40714	0.580822	0.626642	0.605386
RP11-84A14.2	1	9960768	9962768	+	1.04693	1.10356	0.548311	0.512249
CTNNBIP1	1	9969144	9971144	-	5.75813	3.36877	2.74156	2.14213
LZIC	1	10002215	10004215	-	3.48977	5.57589	2.27158	1.53675
RP11-84A14.4	1	10002231	10004231	+	3.43161	5.57589	2.27158	1.53675
NMNAT1	1	10002736	10004736	+	3.31529	4.93699	2.03659	1.58332
7SK	1	10006626	10008626	+	0.465303	0.696986	0.783302	0.698522
RP11-807G9.2	1	10042449	10044449	+	1.27958	0.929315	0.626642	0.74509
RBP7	1	10056514	10058514	+	1.22142	1.56822	2.89822	1.07107
UBE4B	1	10092140	10094140	+	3.48977	3.19452	4.1515	1.62988
U6	1	10222576	10224576	+	0.523466	1.16164	1.01829	0.698522
KIF1B	1	10270014	10272014	+	10.4693	7.95726	3.3682	1.67645
U6	1	10358274	10360274	+	1.16326	1.51014	1.09662	0.558818
PGD	1	10457899	10459899	+	6.16527	6.04055	3.21154	1.62988
APITD1	1	10489409	10491409	+	4.82752	3.54301	3.68152	1.95586
CORT	1	10509026	10511026	+	0.348977	0.580822	0.391651	0.558818
RP5-1113E3.3	1	10517862	10519862	+	0.465303	0.755069	0.783302	0.74509
DFFA	1	10531333	10533333	-	3.43161	2.96219	2.11492	1.07107
PEX14	1	10531595	10533595	+	3.89692	3.36877	2.03659	1.07107
AL139423.1	1	10676143	10678143	+	0.116326	0.52274	0.469981	0.372545
CASZ1	1	10855457	10857457	-	1.74489	1.21973	2.19325	1.0245
C1orf127	1	11040844	11042844	-	0.756118	0.871233	0.469981	0.884795
Y_RNA	1	11058752	11060752	-	0.756118	0.755069	0.861632	0.465681
TARDBP	1	11071664	11073664	+	9.94586	6.91178	5.09146	2.28184
MASP2	1	11106040	11108040	-	0.290815	1.16164	0.626642	0.931363
SRM	1	11118831	11120831	-	7.67751	5.40165	5.09146	2.1887
RP4-635E18.7	1	11127778	11129778	+	0.465303	0.406575	0.391651	0.465681
EXOSC10	1	11158688	11160688	-	4.47854	4.29808	2.81989	1.49018
RP4-635E18.6	1	11158982	11160982	+	4.30406	4.35617	2.81989	1.30391
MTOR-AS1	1	11203205	11205205	+	0.348977	0.290411	0.626642	0.931363
U6	1	11211657	11213657	+	0.523466	0.755069	0.391651	0.74509
snoU13	1	11228420	11230420	-	0.697955	0.348493	1.01829	0.465681
ANGPTL7	1	11248648	11250648	+	0.756118	0.464658	0.469981	0.651954
U6	1	11285561	11287561	+	1.22142	2.67178	1.09662	0.838226
MTOR	1	11321358	11323358	-	3.78059	3.83343	1.5666	1.76959
UBIAD1	1	11332513	11334513	+	4.12957	5.34356	3.05488	1.21077
PTCHD2	1	11538473	11540473	+	6.33976	5.05315	3.68152	1.62988
RP1-69M21.2	1	11668838	11670838	+	0.348977	0.348493	0.861632	0.325977
FBXO44	1	11713682	11715682	+	4.36222	3.77534	2.97655	1.39704
FBXO2	1	11714592	11716592	-	3.31529	3.13644	2.03659	1.30391
FBXO6	1	11723431	11725431	+	7.32853	6.33096	3.3682	1.81616
MAD2L2	1	11750457	11752457	-	1.16326	1.27781	2.19325	1.39704
C1orf187	1	11751036	11753036	+	1.04693	0.987398	2.11492	1.39704
AGTRAP	1	11795391	11797391	+	1.91938	3.13644	2.03659	1.30391
C1orf167	1	11821094	11823094	+	0.697955	0.696986	0.939963	0.698522
RP11-56N19.5	1	11838426	11840426	-	0.581629	0.52274	0.704972	0.605386
CLCN6	1	11865457	11867457	+	3.31529	5.05315	3.91651	1.39704
MTHFR	1	11865727	11867727	-	3.02447	4.99507	3.60319	1.35048
RP5-934G17.2	1	11882087	11884087	-	0.98877	0.52274	0.469981	0.558818
NPPA-AS1	1	11900324	11902324	+	0.697955	0.580822	0.783302	0.558818
NPPA	1	11907152	11909152	-	0.639792	0.406575	0.783302	0.419113
NPPB	1	11917738	11919738	-	0.697955	0.174247	1.5666	0.512249
RNU5E-1	1	11967459	11969459	+	3.1408	5.16932	2.34991	1.72302
RNU5E-4P	1	11968734	11970734	-	3.66426	5.40165	2.5849	2.00243
KIAA2013	1	11985235	11987235	-	7.38669	6.67945	3.44653	2.1887
PLOD1	1	11993512	11995512	+	4.53671	4.06575	2.81989	1.95586
MFN2	1	12039488	12041488	+	6.22343	3.36877	3.05488	2.14213
MIIP	1	12078773	12080773	+	3.02447	4.24	2.19325	2.00243
Y_RNA	1	12082931	12084931	-	0.465303	0.638904	0.469981	0.372545
AL096840.1	1	12095817	12097817	-	1.22142	1.10356	0.861632	1.07107
TNFRSF8	1	12122684	12124684	+	5.6418	7.31836	2.66323	1.11764
U6	1	12136791	12138791	-	2.73366	4.00767	0.626642	0.74509
TNFRSF1B	1	12226310	12228310	+	8.72444	8.94466	4.07317	2.14213
SNORA70	1	12280078	12282078	-	0.756118	0.406575	0.313321	0.698522
VPS13D	1	12289374	12291374	+	6.04894	5.16932	4.77814	1.81616
AL109757.1	1	12468054	12470054	-	1.04693	0.755069	0.704972	0.977931
SNORA59A	1	12566550	12568550	+	0.465303	0.348493	0.704972	0.558818
RP5-888M10.2	1	12587016	12589016	+	0.465303	0.696986	1.01829	0.558818
AL031296.1	1	12589225	12591225	-	0.581629	0.406575	0.704972	0.279409
U6atac	1	12628850	12630850	-	0.232652	0.638904	0.861632	0.558818
DHRS3	1	12676487	12678487	-	1.91938	1.68438	2.11492	1.11764
AADACL4	1	12703816	12705816	+	0.581629	0.52274	0.391651	0.558818
AADACL3	1	12775368	12777368	+	0.40714	0.406575	0.704972	0.512249
snoU13	1	12798943	12800943	+	0.581629	0.755069	0.704972	0.884795
C1orf158	1	12805413	12807413	+	0.697955	0.755069	0.783302	0.512249
PRAMEF12	1	12834234	12836234	+	0.814281	0.232329	0.469981	0.558818
PRAMEF1	1	12850796	12852796	+	0.756118	0.755069	0.234991	0.884795
RP5-845O24.8	1	12881772	12883772	-	0.465303	0.232329	0.548311	0.325977
PRAMEF11	1	12890014	12892014	-	0.814281	0.929315	1.01829	0.884795
HNRNPCL1	1	12907328	12909328	-	0.756118	0.52274	0.469981	0.605386
PRAMEF2	1	12916191	12918191	+	0.40714	0.813151	0.469981	0.605386
PRAMEF4	1	12944775	12946775	-	1.1051	0.464658	0.704972	0.838226
PRAMEF10	1	12956851	12958851	-	0.40714	0.464658	0.469981	0.558818
PRAMEF7	1	12975700	12977700	+	0.348977	0.406575	0.548311	0.232841
U6	1	12981624	12983624	+	0.232652	0.116164	0.469981	0.977931
PRAMEF22	1	13034793	13036793	+	0.174489	0.348493	0.391651	0.419113
WI2-3308P17.2	1	13051748	13053748	-	0.232652	0.232329	0.313321	0.279409
PRAMEF6	1	13116501	13118501	-	0.465303	0.580822	0.626642	0.372545
RP13-221M14.2	1	13146027	13148027	+	0.465303	0.464658	0.626642	0.419113
WI2-2994D6.2	1	13218331	13220331	-	0.581629	0.52274	1.01829	0.884795
PRAMEF3	1	13330442	13332442	-	0.174489	0.290411	0.234991	0.325977
PRAMEF5	1	13359069	13361069	+	0.756118	0.638904	0.626642	0.884795
U6	1	13383591	13385591	-	0.756118	0.232329	0.548311	0.74509
RP11-219C24.9	1	13384653	13386653	-	0.930607	0.348493	0.548311	0.605386
PRAMEF8	1	13389515	13391515	-	0.232652	0.232329	1.01829	0.419113
PRAMEF9	1	13420426	13422426	+	0.523466	0.406575	0.939963	0.838226
RP11-219C24.10	1	13428884	13430884	+	0.639792	0.464658	0.704972	0.465681
PRAMEF13	1	13451406	13453406	-	0.756118	1.10356	0.704972	0.605386
PRAMEF18	1	13476319	13478319	-	0.348977	0.348493	0.313321	0.279409
PRAMEF16	1	13494504	13496504	+	0.232652	0.232329	0.15666	0.325977
PRAMEF21	1	13515316	13517316	+	0.697955	0.290411	0.234991	0.139704
PRAMEF15	1	13641223	13643223	+	0.697955	0.813151	0.626642	0.372545
RP11-584P2.1	1	13649681	13651681	+	0.465303	0.52274	0.704972	0.372545
PRAMEF14	1	13672261	13674261	-	0.581629	0.813151	0.783302	0.512249
PRAMEF19	1	13697155	13699155	-	0.348977	0.406575	0.15666	0.605386
PRAMEF17	1	13715338	13717338	+	0.40714	0.696986	0.313321	0.325977
PRAMEF20	1	13736157	13738157	+	0.523466	0.464658	0.469981	0.325977
RP4-597A16.2	1	13838965	13840965	+	0.581629	0.755069	0.783302	0.372545
LRRC38	1	13839293	13841293	-	0.639792	0.464658	0.861632	0.419113
PDPN	1	13909210	13911210	+	0.348977	0.464658	0.939963	0.512249
RN5S41	1	13948529	13950529	-	0.581629	0.290411	0.313321	0.419113
CTA-520D8.2	1	13985783	13987783	-	0.523466	0.755069	0.783302	1.21077
SCARNA11	1	14021444	14023444	-	0.348977	1.10356	0.939963	0.651954
PRDM2	1	14025943	14027943	+	17.2744	15.1014	4.1515	2.42154
RP5-1177E19.2	1	14104375	14106375	-	0.98877	0.638904	0.626642	0.74509
C1orf196	1	14218302	14220302	+	1.68672	0.813151	1.80159	0.977931
U6	1	14449580	14451580	-	0.40714	0.232329	0.234991	0.651954
RP11-344F13.1	1	14548363	14550363	-	0.348977	0.464658	0.548311	0.558818
RP4-704D23.1	1	14676268	14678268	-	0.465303	0.52274	0.15666	0.651954
KAZN	1	14924450	14926450	+	2.0357	1.85863	1.25328	1.0245
C1orf126	1	15477710	15479710	-	1.22142	0.696986	0.939963	0.791658
TMEM51	1	15478278	15480278	+	2.61733	2.32329	1.40994	1.25734
C1orf195	1	15496563	15498563	-	0.930607	0.696986	0.783302	0.838226
FHAD1	1	15573018	15575018	+	2.79182	2.03288	2.11492	1.49018
RP3-467K16.7	1	15660710	15662710	-	0.40714	0.290411	0.0783302	0.325977
RP3-467K16.2	1	15669122	15671122	-	0.581629	0.813151	0.626642	0.931363
RP3-467K16.4	1	15734679	15736679	-	7.85199	7.02795	3.28987	1.76959
EFHD2	1	15735641	15737641	+	10.5856	9.17699	4.46482	1.90929
CTRC	1	15764185	15766185	+	0.639792	0.929315	0.548311	0.605386
CELA2A	1	15782473	15784473	+	0.814281	1.27781	0.939963	0.977931
CELA2B	1	15791654	15793654	+	0.581629	0.348493	0.391651	0.698522
CASP9	1	15851779	15853779	-	3.43161	2.96219	2.34991	1.76959
DNAJC16	1	15852558	15854558	+	3.08263	2.38137	2.03659	1.67645
SCARNA21	1	15867910	15869910	+	0.697955	0.406575	0.939963	0.884795
AGMAT	1	15910355	15912355	-	5.69997	4.76274	2.5849	1.39704
RP4-680D5.2	1	15928871	15930871	-	1.68672	2.09096	2.03659	1.11764
U7	1	15933390	15935390	-	1.39591	0.406575	0.626642	0.791658
DDI2	1	15943245	15945245	+	7.61934	8.18959	4.85647	2.65438
RSC1A1	1	15985614	15987614	+	0.930607	0.638904	0.704972	0.419113
PLEKHM2	1	16010077	16012077	+	11.7489	9.40932	3.28987	2.049
RP11-288I21.1	1	16062141	16064141	-	0.872444	0.638904	0.861632	0.651954
SLC25A34	1	16062150	16064150	+	0.872444	0.638904	0.861632	0.651954
TMEM82	1	16068167	16070167	+	0.814281	0.755069	1.09662	0.419113
RP11-169K16.4	1	16075141	16077141	-	0.639792	0.348493	0.234991	0.512249
FBLIM1	1	16082352	16084352	+	0.756118	0.755069	0.861632	0.698522
RP11-169K16.9	1	16173392	16175392	-	22.7417	19.5156	6.50141	2.88722
SPEN	1	16173609	16175609	+	23.4397	20.2126	6.7364	2.88722
snoU13	1	16236642	16238642	+	1.04693	0.871233	0.469981	0.977931
ZBTB17	1	16301377	16303377	-	8.66628	7.8411	3.75985	1.72302
C1orf64	1	16329981	16331981	+	0.523466	0.813151	0.469981	0.419113
RP11-5P18.5	1	16331916	16333916	-	0.639792	0.813151	0.783302	0.791658
CLCNKA	1	16344580	16346580	+	0.40714	0.52274	0.704972	0.372545
HSPB7	1	16344839	16346839	-	0.40714	0.464658	0.548311	0.372545
CLCNKB	1	16369497	16371497	+	0.697955	0.813151	0.469981	0.977931
FAM131C	1	16398877	16400877	-	2.38468	1.80055	2.81989	1.30391
RP11-276H7.2	1	16480956	16482956	+	2.0357	0.871233	1.72326	1.07107
EPHA2	1	16481332	16483332	-	2.15203	1.10356	1.5666	1.07107
RP11-276H7.3	1	16485011	16487011	+	0.581629	0.638904	0.626642	0.698522
ARHGEF19-AS1	1	16523599	16525599	+	0.872444	0.696986	0.704972	0.465681
ARHGEF19	1	16537890	16539890	-	0.930607	0.638904	0.234991	0.838226
ANO7L1	1	16542573	16544573	-	1.33775	1.10356	2.19325	1.0245
C1orf134	1	16554844	16556844	-	0.697955	0.464658	0.704972	0.74509
RSG1	1	16562245	16564245	-	3.78059	3.65918	2.74156	0.931363
FBXO42	1	16677699	16679699	-	6.57241	5.05315	3.99484	2.28184
C1orf144	1	16678320	16680320	+	5.99078	4.87891	3.83818	2.1887
SPATA21	1	16762669	16764669	-	0.814281	0.987398	1.17495	0.931363
NECAP2	1	16766417	16768417	+	2.96631	3.89151	1.87992	1.44361
RP4-798A10.2	1	16786693	16788693	+	1.27958	0.580822	0.861632	0.558818
RNU1-1	1	16839530	16841530	-	6.22343	6.79562	4.9348	3.49261
RP4-798A10.4	1	16846439	16848439	+	0.697955	0.464658	0.626642	0.791658
U1	1	16859469	16861469	-	1.51224	1.6263	2.89822	2.23527
RP4-798A10.5	1	16860255	16862255	-	1.45407	1.91671	2.81989	2.14213
RP5-875O13.1	1	16860894	16862894	-	1.62856	1.80055	2.81989	2.049
AL355149.1	1	16861505	16863505	+	1.68672	1.45206	1.72326	1.49018
TRNAG36	1	16872982	16874982	-	1.1051	1.33589	2.03659	1.62988
AL355149.2	1	16879207	16881207	+	1.22142	1.27781	0.704972	1.35048
NBPF1	1	16938833	16940833	-	7.56118	6.33096	9.63462	5.2622
AL137798.2	1	16946160	16948160	+	1.33775	1.51014	1.5666	1.44361
CROCCP2	1	16969928	16971928	-	8.25913	8.36384	7.98968	4.14456
AL137798.3	1	16974647	16976647	-	1.04693	0.813151	1.80159	1.67645
RNU1-3	1	16992193	16994193	-	5.11834	5.92439	3.99484	2.65438
AL137798.1	1	16998748	17000748	+	1.33775	0.871233	1.33161	1.44361
TRNAV36P	1	17051311	17053311	+	1.86121	1.6263	2.89822	2.56125
RNU1-4	1	17066261	17068261	+	5.93262	5.34356	4.1515	2.56125
MST1P9	1	17095482	17097482	-	1.22142	0.696986	1.09662	1.30391
RP11-108M9.1	1	17178374	17180374	-	0.697955	0.929315	1.40994	0.74509
TRNAL48	1	17179721	17181721	-	0.756118	1.16164	0.783302	0.698522
RP11-108M9.2	1	17181152	17183152	+	1.1051	1.10356	1.25328	0.838226
TRNAV34P	1	17185943	17187943	+	1.33775	1.33589	1.72326	1.49018
RP11-108M9.3	1	17196690	17198690	+	1.04693	1.10356	1.72326	1.35048
BX284668.1	1	17197418	17199418	-	1.39591	1.27781	2.81989	1.95586
U1	1	17199453	17201453	+	1.97754	1.91671	3.3682	2.23527
RP11-108M9.4	1	17214894	17216894	-	1.62856	1.27781	1.80159	1.67645
CROCC	1	17221482	17223482	+	5.58364	6.15671	4.30816	2.84066
RNU1-2	1	17221725	17223725	+	5.52548	6.2148	4.38649	2.98036
RP1-37C10.3	1	17304671	17306671	+	0.581629	0.406575	0.391651	0.558818
MFAP2	1	17306080	17308080	-	1.16326	1.21973	1.17495	0.838226
ATP13A2	1	17337173	17339173	-	5.6418	3.07836	2.81989	1.49018
SDHB	1	17379415	17381415	-	2.21019	2.09096	1.95826	1.30391
PADI2	1	17444698	17446698	-	0.872444	0.813151	1.72326	1.21077
Y_RNA	1	17483942	17485942	+	0.523466	0.638904	1.09662	0.605386
RP11-380J14.1	1	17515528	17517528	+	0.872444	0.987398	0.548311	0.512249
PADI1	1	17530871	17532871	+	0.465303	0.580822	0.861632	0.605386
PADI3	1	17574843	17576843	+	0.581629	0.638904	0.783302	0.512249
PADI4	1	17633940	17635940	+	0.756118	0.52274	0.704972	0.558818
PADI6	1	17697941	17699941	+	0.523466	0.232329	0.548311	0.419113
RP1-20B21.4	1	17732506	17734506	+	0.348977	0.232329	1.17495	0.838226
RCC2	1	17764970	17766970	-	5.69997	6.33096	2.50657	1.62988
snoU13	1	17775509	17777509	+	0.40714	0.696986	0.861632	0.651954
ARHGEF10L	1	17865580	17867580	+	0.639792	0.987398	1.25328	0.605386
RP11-473A10.2	1	18043432	18045432	+	0.581629	0.290411	0.469981	0.605386
ACTL8	1	18081058	18083058	+	0.290815	0.232329	0.548311	0.419113
IGSF21	1	18433490	18435490	+	0.290815	0.348493	1.17495	0.977931
RP11-174G17	1	18504590	18506590	-	0.290815	0.290411	0.391651	0.419113
RP11-422P22.1	1	18711573	18713573	+	0.581629	0.696986	0.313321	0.465681
KLHDC7A	1	18806674	18808674	+	0.756118	0.987398	0.313321	0.651954
PAX7	1	18956750	18958750	+	0.697955	0.290411	1.17495	0.791658
TAS1R2	1	19184926	19186926	-	0.348977	0.696986	0.469981	0.325977
MIR1290	1	19222392	19224392	-	0.290815	0.52274	1.09662	0.465681
ALDH4A1	1	19228025	19230025	-	6.63057	6.27288	2.42824	1.58332
RP13-279N23.2	1	19246365	19248365	-	0.756118	0.406575	0.548311	0.605386
IFFO2	1	19281930	19283930	-	12.9703	7.66685	5.32645	2.00243
UBR4	1	19535520	19537520	-	8.43362	6.62137	3.28987	1.39704
RP1-43E13.2	1	19536245	19538245	+	7.2122	5.45973	3.05488	1.49018
KIAA0090	1	19576796	19578796	-	5.81629	4.41425	2.5849	1.49018
MRTO4	1	19577283	19579283	+	6.33976	4.87891	2.89822	1.35048
AKR7L	1	19599438	19601438	-	0.814281	1.10356	0.939963	0.698522
AKR7A3	1	19614494	19616494	-	0.756118	0.813151	1.95826	1.21077
U6	1	19630426	19632426	-	0.465303	0.696986	0.548311	0.232841
AKR7A2	1	19637390	19639390	-	7.50302	6.27288	4.30816	2.00243
PQLC2	1	19638070	19640070	+	7.56118	6.91178	4.38649	1.86273
AL445163.1	1	19750128	19752128	+	0.40714	0.232329	0.861632	1.07107
CAPZB	1	19810816	19812816	-	13.6683	12.9523	4.77814	2.14213
U4	1	19836337	19838337	+	0.523466	0.813151	1.48827	0.512249
snoU13	1	19857518	19859518	-	0.348977	0.406575	0.704972	0.651954
RP5-1056L3.1	1	19922076	19924076	-	7.79383	6.8537	4.38649	2.46811
MINOS1	1	19922727	19924727	+	7.56118	7.20219	4.69981	2.23527
NBL1	1	19966298	19968298	+	0.465303	0.406575	0.783302	0.698522
HTR6	1	19991030	19993030	+	3.48977	1.80055	2.11492	1.62988
TMCO4	1	20125188	20127188	-	10.0622	6.67945	2.27158	2.00243
RP11-91K11.2	1	20140110	20142110	+	0.639792	0.580822	0.548311	0.279409
RNF186	1	20140521	20142521	-	0.523466	0.696986	0.626642	0.279409
OTUD3	1	20208256	20210256	+	9.71321	7.20219	3.3682	1.86273
PLA2G2E	1	20248860	20250860	-	0.581629	0.348493	0.626642	0.279409
AL358253.1	1	20296713	20298713	+	0.814281	0.696986	0.704972	0.931363
PLA2G2A	1	20305682	20307682	-	0.232652	0.348493	0.313321	0.372545
PLA2G5	1	20353922	20355922	+	0.581629	0.464658	0.391651	0.838226
PLA2G2D	1	20444800	20446800	-	0.930607	1.6263	0.783302	0.372545
PLA2G2F	1	20465069	20467069	+	0.581629	0.638904	0.391651	0.465681
RP3-340N1.2	1	20480081	20482081	+	1.04693	0.871233	1.40994	0.698522
PLA2G2C	1	20502667	20504667	-	0.756118	0.638904	0.469981	0.74509
RP3-340N1.5	1	20511729	20513729	-	2.90815	3.2526	1.40994	1.53675
UBXN10	1	20511828	20513828	+	3.02447	3.31069	1.25328	1.72302
RP3-340N1.6	1	20568838	20570838	+	0.290815	0.348493	1.09662	0.651954
VWA5B1	1	20616662	20618662	+	0.523466	0.348493	0.626642	0.651954
RP4-745E8.2	1	20648430	20650430	-	0.872444	1.33589	1.01829	0.558818
RP4-749H3.2	1	20738496	20740496	-	0.697955	0.696986	0.391651	0.74509
RP4-749H3.1	1	20756477	20758477	-	0.523466	0.290411	0.861632	0.74509
CAMK2N1	1	20811463	20813463	-	1.80305	1.45206	1.40994	1.1642
MUL1	1	20833404	20835404	-	2.44284	2.72986	2.11492	1.0245
FAM43B	1	20878182	20880182	+	0.639792	0.813151	1.33161	0.698522
CDA	1	20914691	20916691	+	0.814281	0.696986	1.01829	0.465681
PINK1	1	20959198	20961198	+	4.7112	2.78795	2.81989	2.23527
PINK1-AS1	1	20977436	20979436	-	0.814281	0.406575	0.313321	0.605386
DDOST	1	20986750	20988750	-	3.19896	4.76274	2.03659	2.42154
KIF17	1	21043260	21045260	-	2.38468	1.85863	2.42824	0.791658
SH2D5	1	21058080	21060080	-	4.30406	2.72986	2.66323	1.81616
RP5-930J4.2	1	21058623	21060623	+	2.44284	1.68438	2.27158	1.72302
RP5-930J4.4	1	21068730	21070730	+	0.465303	0.348493	0.861632	0.698522
HP1BP3	1	21112566	21114566	-	14.7152	12.7781	5.63978	2.32841
U7	1	21166984	21168984	+	1.16326	0.290411	1.40994	1.1642
MIR1256	1	21313675	21315675	-	0.40714	1.39397	0.861632	0.465681
EIF4G3	1	21502127	21504127	-	8.95709	6.62137	3.28987	1.62988
RP3-329E20.2	1	21591825	21593825	+	0.40714	0.755069	0.626642	0.698522
RP5-1071N3.1	1	21619033	21621033	+	5.11834	6.38904	2.11492	1.39704
ECE1	1	21670747	21672747	-	9.48056	7.26028	4.07317	2.09557
AL592309.1	1	21739964	21741964	+	0.581629	0.987398	0.548311	0.977931
RP11-293F5.1	1	21741641	21743641	+	0.581629	0.580822	0.861632	0.605386
NBPF3	1	21765871	21767871	+	3.37345	1.9748	1.87992	1.76959
ALPL	1	21835108	21837108	+	0.930607	0.696986	1.25328	0.884795
RP11-63N8.3	1	21912215	21914215	+	0.348977	0.580822	0.469981	0.465681
AL359815.1	1	21917791	21919791	-	0.465303	0.580822	0.391651	0.605386
RAP1GAP	1	21994606	21996606	-	1.97754	1.51014	2.50657	1.11764
USP48	1	22108849	22110849	-	10.353	8.30576	4.38649	3.35291
LDLRAD2	1	22138008	22140008	+	1.16326	1.27781	0.626642	0.558818
HSPG2	1	22262540	22264540	-	2.67549	2.49754	1.72326	0.651954
CELA3B	1	22302764	22304764	+	0.465303	0.52274	0.469981	0.838226
AL590556.1	1	22313224	22315224	+	1.1051	0.52274	1.09662	0.74509
U6	1	22313559	22315559	+	0.98877	0.464658	1.09662	0.838226
CELA3A	1	22327399	22329399	+	0.465303	0.52274	0.626642	0.74509
AL590556.2	1	22336393	22338393	+	0.814281	0.580822	0.313321	0.698522
U6	1	22336728	22338728	+	0.581629	0.290411	0.391651	0.791658
RP1-224A6.3	1	22350211	22352211	-	3.95508	4.99507	1.48827	1.86273
LINC00339	1	22350931	22352931	+	5.93262	7.60877	1.72326	2.23527
CDC42	1	22378370	22380370	+	16.2856	12.8362	5.24812	2.70095
CDC42-IT1	1	22384940	22386940	+	1.33775	0.871233	0.391651	0.325977
WNT4	1	22469212	22471212	-	3.54794	1.51014	2.03659	1.53675
ZBTB40	1	22777594	22779594	+	2.84998	4.24	3.05488	1.30391
ZBTB40-IT1	1	22843217	22845217	+	0.348977	0.696986	0.391651	0.419113
EPHA8	1	22889307	22891307	+	0.930607	0.580822	0.626642	0.558818
C1QA	1	22962249	22964249	+	0.639792	0.406575	0.313321	0.325977
C1QC	1	22969373	22971373	+	0.40714	0.290411	0.704972	0.558818
C1QB	1	22978505	22980505	+	0.116326	0.464658	0.548311	0.884795
EPHB2	1	23036582	23038582	+	5.11834	1.9748	1.87992	1.25734
AL611946.1	1	23074560	23076560	+	1.04693	0.929315	0.626642	0.651954
RP11-69E9.1	1	23162092	23164092	-	0.465303	0.406575	0.704972	0.419113
LACTBL1	1	23290547	23292547	-	0.465303	0.232329	0.704972	0.605386
RP4-805N21.1	1	23339288	23341288	-	0.581629	1.10356	0.939963	0.605386
KDM1A	1	23345191	23347191	+	9.94586	9.99014	4.54315	2.88722
RP1-184J9.2	1	23413301	23415301	-	0.756118	0.638904	0.548311	0.74509
U6	1	23488447	23490447	+	1.22142	0.813151	0.469981	0.605386
U6	1	23489696	23491696	+	0.872444	0.464658	0.469981	0.651954
LUZP1	1	23503051	23505051	-	2.90815	3.31069	2.81989	1.30391
HTR1D	1	23519972	23521972	-	0.523466	0.406575	0.391651	0.698522
HNRNPR	1	23669579	23671579	-	13.9009	12.2553	4.77814	2.60782
ZNF436	1	23694685	23696685	-	4.0714	4.00767	3.83818	2.00243
C1orf213	1	23694740	23696740	+	4.01324	4.00767	3.75985	1.95586
Y_RNA	1	23695997	23697997	+	1.5704	1.56822	0.939963	0.838226
TCEA3	1	23749983	23751983	-	0.756118	0.929315	2.27158	0.791658
ASAP3	1	23809500	23811500	-	3.78059	1.68438	2.27158	1.62988
E2F2	1	23856462	23858462	-	8.43362	7.08603	2.5849	2.09557
RP1-150O5.3	1	23876156	23878156	-	1.39591	1.56822	0.469981	0.74509
ID3	1	23885035	23887035	-	2.90815	3.6011	1.25328	1.1642
MDS2	1	23907235	23909235	+	0.930607	0.929315	0.861632	0.791658
AL451000.1	1	23944707	23946707	-	3.83875	2.67178	1.01829	1.53675
RPL11	1	24017519	24019519	+	3.72243	4.35617	2.19325	1.44361
AL031295.1	1	24062130	24064130	-	1.45407	2.84603	1.09662	1.07107
TCEB3	1	24068895	24070895	+	16.7509	16.1469	6.18809	2.51468
RP5-886K2.3	1	24103527	24105527	-	7.96832	5.05315	3.21154	2.46811
PITHD1	1	24104145	24106145	+	8.14281	5.28548	3.44653	2.23527
LYPLA2	1	24116710	24118710	+	3.19896	3.89151	1.40994	1.11764
GALE	1	24126021	24128021	-	6.51425	6.56329	4.38649	1.58332
HMGCL	1	24163860	24165860	-	0.872444	1.91671	1.64493	1.49018
FUCA1	1	24193534	24195534	-	3.89692	2.84603	2.81989	2.32841
snoU13	1	24207995	24209995	+	0.98877	0.52274	0.939963	0.931363
RP11-4M23.3	1	24233125	24235125	-	3.54794	5.34356	1.40994	1.35048
CNR2	1	24284299	24286299	-	3.48977	3.36877	1.40994	1.1642
PNRC2	1	24284849	24286849	+	4.59487	4.35617	2.19325	1.76959
SRSF10	1	24306167	24308167	-	5.69997	6.62137	1.80159	0.838226
RP11-293P20.2	1	24366593	24368593	+	0.756118	1.04548	1.17495	0.838226
RP11-293P20.4	1	24392514	24394514	+	0.872444	0.348493	0.861632	0.605386
RP11-293P20.3	1	24409372	24411372	-	0.523466	0.52274	0.469981	0.465681
MYOM3	1	24437415	24439415	-	0.872444	0.406575	0.861632	0.791658
IL22RA1	1	24468361	24470361	-	0.523466	0.174247	0.469981	0.325977
IL28RA	1	24513199	24515199	-	8.89893	8.36384	3.05488	1.35048
RP11-10N16.2	1	24525980	24527980	+	1.39591	0.871233	0.704972	0.325977
GRHL3	1	24645062	24647062	+	0.639792	0.52274	0.391651	0.558818
RP11-10N16.3	1	24647170	24649170	-	3.37345	2.49754	2.66323	1.72302
NIPAL3	1	24741534	24743534	+	1.91938	2.32329	2.27158	1.39704
C1orf201	1	24742174	24744174	-	1.5704	2.03288	1.80159	1.35048
AL031431.1	1	24795679	24797679	-	0.348977	0.755069	0.626642	0.605386
RCAN3	1	24828637	24830637	+	4.36222	3.83343	3.05488	1.90929
RP4-594I10.2	1	24864121	24866121	-	0.639792	0.755069	1.33161	0.931363
C1orf130	1	24881852	24883852	+	1.5704	0.696986	1.40994	1.11764
Y_RNA	1	24950754	24952754	-	0.465303	0.52274	0.939963	1.07107
SRRM1	1	24957457	24959457	+	0.814281	0.871233	0.704972	0.74509
snoU13	1	24992328	24994328	-	0.523466	0.638904	0.939963	0.605386
CLIC4	1	25071098	25073098	+	14.5989	12.4296	4.46482	2.60782
U6	1	25103220	25105220	-	1.33775	0.929315	0.391651	0.651954
AL023096.1	1	25235884	25237884	+	1.22142	1.21973	1.09662	0.931363
RP11-84D1.1	1	25287086	25289086	+	1.33775	0.929315	0.548311	0.698522
RUNX3	1	25290362	25292362	-	3.89692	5.69206	1.5666	0.884795
RP4-799D16.1	1	25438361	25440361	-	0.872444	0.696986	0.626642	0.791658
RP4-706G24.1	1	25533880	25535880	+	0.756118	0.464658	0.939963	0.698522
SYF2	1	25557743	25559743	-	4.53671	4.53041	1.72326	1.07107
C1orf63	1	25593077	25595077	-	3.66426	5.11123	3.99484	0.931363
RP11-335G20.5	1	25593126	25595126	-	3.72243	5.05315	3.91651	0.884795
RHD	1	25598231	25600231	+	0.697955	0.580822	1.09662	0.977931
TMEM50A	1	25663658	25665658	+	6.86322	8.24767	3.75985	2.23527
U6	1	25666712	25668712	+	1.1051	1.56822	1.64493	0.977931
snoU13	1	25671618	25673618	-	1.1051	1.56822	0.469981	0.838226
RHCE	1	25755433	25757433	-	5.06017	4.47233	3.91651	2.09557
TMEM57	1	25756638	25758638	+	10.353	8.42192	4.69981	2.60782
LDLRAP1	1	25869321	25871321	+	6.45608	5.45973	3.52486	2.00243
RP11-70P17.1	1	25907219	25909219	+	0.465303	0.290411	0.548311	0.605386
MAN1C1	1	25943209	25945209	+	4.59487	3.48493	3.99484	1.53675
RP1-187B23.1	1	25984352	25986352	-	0.174489	0.290411	0.783302	0.419113
SEPN1	1	26125917	26127917	+	3.08263	1.45206	1.64493	1.11764
RP1-317E23.6	1	26137211	26139211	+	0.98877	0.755069	0.704972	0.651954
FAM54B	1	26144381	26146381	+	1.80305	1.91671	1.25328	1.21077
RP1-317E23.3	1	26145013	26147013	-	6.63057	4.47233	3.28987	1.53675
AL020996.1	1	26146038	26148038	-	7.27036	6.09863	4.69981	1.53675
C1orf135	1	26184653	26186653	-	2.84998	3.42685	3.05488	1.25734
RP1-125I3.2	1	26185354	26187354	+	2.79182	3.19452	3.52486	1.39704
PAQR7	1	26196494	26198494	-	0.639792	1.21973	0.391651	0.884795
Y_RNA	1	26203237	26205237	+	0.756118	0.580822	0.783302	0.838226
STMN1	1	26232232	26234232	-	5.69997	5.2274	4.1515	2.51468
U6	1	26289938	26291938	+	0.639792	0.464658	0.783302	0.838226
PAFAH2	1	26323398	26325398	-	2.0357	3.07836	2.50657	1.25734
SCARNA17	1	26331747	26333747	+	0.465303	0.987398	0.626642	0.419113
SCARNA18	1	26331957	26333957	+	0.40714	1.04548	0.469981	0.325977
EXTL1	1	26345625	26347625	+	0.814281	0.755069	0.469981	0.698522
SLC30A2	1	26371374	26373374	-	1.39591	0.52274	1.72326	1.07107
TRIM63	1	26393677	26395677	-	0.348977	0.406575	0.626642	0.372545
PDIK1L	1	26436914	26438914	+	14.4826	11.6745	6.89306	2.60782
GRRP1	1	26484761	26486761	+	0.348977	0.406575	0.391651	0.884795
ZNF593	1	26495612	26497612	+	3.78059	2.90411	2.50657	1.76959
RP11-96L14.7	1	26497062	26499062	-	0.756118	0.580822	0.391651	0.698522
CNKSR1	1	26503144	26505144	+	0.814281	0.813151	0.626642	0.651954
CATSPER4	1	26516302	26518302	+	0.639792	0.580822	0.783302	0.558818
CEP85	1	26559941	26561941	+	4.12957	3.71726	2.34991	1.67645
AL355877.1	1	26572495	26574495	+	0.639792	0.929315	0.626642	0.651954
RP11-231P20.3	1	26574642	26576642	+	0.523466	0.755069	0.548311	0.605386
SH3BGRL3	1	26604917	26606917	+	4.24589	5.05315	4.77814	1.86273
UBXN11	1	26643604	26645604	-	2.96631	5.34356	1.72326	1.49018
CD52	1	26643698	26645698	+	3.02447	5.51781	1.72326	1.62988
AIM1L	1	26679371	26681371	-	0.697955	0.580822	0.469981	0.465681
ZNF683	1	26699763	26701763	-	1.04693	0.987398	1.40994	0.698522
LIN28A	1	26736519	26738519	+	0.581629	0.174247	1.09662	0.512249
DHDDS	1	26758023	26760023	+	2.44284	2.90411	1.87992	1.72302
RP3-476K8.3	1	26792523	26794523	-	0.697955	0.348493	0.626642	0.419113
HMGN2	1	26798191	26800191	+	13.552	8.88658	5.09146	3.2132
RPS6KA1	1	26855502	26857502	+	5.81629	5.11123	2.34991	2.28184
MIR1976	1	26880283	26882283	+	0.581629	0.929315	0.469981	1.0245
AL627313.1	1	26918787	26920787	-	0.814281	0.580822	1.64493	0.791658
Y_RNA	1	26919282	26921282	-	0.98877	0.696986	1.40994	0.838226
snoU13	1	26967630	26969630	-	0.697955	1.21973	1.01829	0.884795
ARID1A	1	27021774	27023774	+	32.5712	31.0159	6.97139	4.098
PIGV	1	27113213	27115213	+	10.8765	11.6164	4.38649	2.37497
AL034380.1	1	27140566	27142566	+	0.814281	0.987398	1.01829	0.791658
ZDHHC18	1	27152451	27154451	+	8.02648	5.51781	2.11492	1.25734
SFN	1	27188883	27190883	+	1.1051	1.51014	1.40994	0.605386
RP1-50O24.6	1	27201874	27203874	+	0.872444	0.696986	0.548311	0.651954
GPN2	1	27215538	27217538	-	6.45608	4.47233	2.19325	1.44361
RP1-50O24.8	1	27217802	27219802	-	0.174489	0.813151	1.01829	0.558818
GPATCH3	1	27225712	27227712	-	2.90815	4.18192	1.95826	1.44361
NUDC	1	27225979	27227979	+	2.79182	4.12384	1.80159	1.44361
NR0B2	1	27239207	27241207	-	0.756118	0.290411	0.391651	0.791658
C1orf172	1	27285647	27287647	-	1.45407	1.45206	1.64493	1.11764
TRNP1	1	27319448	27321448	+	2.90815	1.39397	2.66323	1.67645
FAM46B	1	27338077	27340077	-	1.04693	0.696986	1.33161	0.931363
SLC9A1	1	27492222	27494222	-	0.814281	0.696986	0.469981	0.651954
RP11-40H20.4	1	27559593	27561593	-	6.04894	5.16932	4.22983	1.67645
WDTC1	1	27560257	27562257	+	7.61934	6.73754	4.54315	2.09557
Y_RNA	1	27580808	27582808	-	2.50101	2.78795	1.25328	1.0245
RP11-4K3__A.2	1	27633028	27635028	-	0.465303	0.755069	0.548311	0.419113
AL663123.1	1	27640111	27642111	-	0.756118	0.464658	0.469981	0.512249
TMEM222	1	27647901	27649901	+	3.89692	4.00767	2.89822	1.1642
U6	1	27650960	27652960	+	0.581629	0.406575	0.626642	0.838226
SYTL1	1	27667763	27669763	+	2.90815	3.83343	2.19325	1.39704
MAP3K6	1	27692133	27694133	-	3.72243	1.74247	2.27158	1.30391
FCN3	1	27700065	27702065	-	0.348977	1.10356	0.939963	0.605386
CD164L2	1	27708620	27710620	-	0.872444	0.696986	1.48827	0.605386
GPR3	1	27718398	27720398	+	2.79182	2.26521	2.74156	1.62988
RP4-752I6.1	1	27782959	27784959	+	0.872444	1.10356	1.01829	0.838226
WASF2	1	27815419	27817419	-	8.95709	9.40932	4.46482	2.60782
RP1-159A19.4	1	27851566	27853566	+	1.97754	2.49754	1.40994	1.1642
AHDC1	1	27929692	27931692	-	6.16527	3.19452	3.44653	2.56125
FGR	1	27960538	27962538	-	8.02648	7.4926	3.21154	1.25734
RP11-288L9.1	1	27987983	27989983	-	2.61733	4.99507	1.95826	0.884795
RP11-288L9.4	1	27995229	27997229	+	1.04693	1.21973	0.548311	0.791658
IFI6	1	27997479	27999479	-	2.21019	2.20712	1.33161	1.1642
U6	1	28000970	28002970	-	0.814281	0.987398	1.48827	0.74509
U6	1	28019492	28021492	+	1.1051	0.696986	0.939963	0.651954
FAM76A	1	28051740	28053740	+	8.02648	6.2148	4.62148	2.42154
AL020997.1	1	28093632	28095632	-	1.1051	1.10356	0.939963	0.74509
STX12	1	28098944	28100944	+	4.7112	5.11123	3.3682	1.49018
U6	1	28150299	28152299	+	0.697955	0.464658	0.391651	0.465681
PPP1R8	1	28156539	28158539	+	5.1765	4.99507	1.25328	0.838226
SCARNA1	1	28160162	28162162	+	0.639792	1.21973	0.704972	0.419113
C1orf38	1	28198305	28200305	+	6.80506	6.73754	2.50657	1.39704
RPA2	1	28240007	28242007	-	3.08263	4.76274	1.64493	1.49018
SMPDL3B	1	28260754	28262754	+	1.27958	1.33589	1.01829	0.605386
XKR8	1	28285223	28287223	+	4.24589	3.13644	3.52486	1.90929
RP11-460I13.2	1	28285454	28287454	-	4.12957	3.07836	3.68152	1.90929
EYA3-IT1	1	28356173	28358173	-	1.5704	0.813151	0.861632	1.1642
AL512288.1	1	28357441	28359441	-	0.40714	0.813151	0.939963	0.977931
EYA3	1	28413957	28415957	-	5.29282	5.80822	1.48827	1.72302
U6	1	28468102	28470102	-	1.68672	2.32329	1.33161	1.11764
RNU7-29P	1	28469478	28471478	-	3.78059	5.40165	1.95826	1.25734
PTAFR	1	28519197	28521197	-	1.04693	1.39397	0.704972	0.698522
AL353354.1	1	28525902	28527902	-	3.02447	3.71726	1.33161	1.35048
DNAJC8	1	28558286	28560286	-	2.84998	3.54301	1.33161	0.838226
ATPIF1	1	28561870	28563870	+	3.19896	5.05315	1.64493	1.44361
SESN2	1	28585288	28587288	+	4.47854	5.63397	3.75985	2.049
AL353622.1	1	28637653	28639653	-	0.756118	0.348493	0.626642	0.651954
MED18	1	28654763	28656763	+	3.83875	6.73754	2.66323	2.00243
PHACTR4	1	28695364	28697364	+	4.88568	5.92439	3.21154	1.76959
Y_RNA	1	28747916	28749916	-	0.697955	0.755069	1.17495	0.977931
U6atac	1	28807124	28809124	+	1.04693	1.39397	1.09662	0.605386
RCC1	1	28831705	28833705	+	5.40915	10.2806	1.5666	1.90929
SNHG3	1	28831742	28833742	+	5.40915	10.2806	1.48827	1.95586
SNORA73A	1	28833128	28835128	+	4.76936	9.11891	1.01829	1.39704
SNORA73B	1	28834321	28836321	+	3.1408	5.75014	1.17495	0.977931
AL513497.1	1	28835859	28837859	-	2.61733	3.13644	1.5666	0.884795
snoU13	1	28843238	28845238	+	7.96832	6.04055	1.80159	1.86273
TRNAU1AP	1	28878847	28880847	+	3.83875	6.62137	3.52486	1.30391
SNORD99	1	28904084	28906084	-	0.814281	1.04548	0.783302	0.931363
SNORA61	1	28905155	28907155	-	1.33775	2.09096	0.861632	1.1642
SNORA44	1	28905774	28907774	-	2.0357	3.02027	1.25328	1.35048
SNORA16A	1	28906316	28908316	-	3.83875	5.16932	1.72326	1.44361
SNHG12	1	28908245	28910245	-	3.31529	3.89151	2.5849	1.58332
RAB42	1	28917962	28919962	+	2.73366	2.09096	1.40994	1.0245
TAF12	1	28968347	28970347	-	4.18773	5.57589	3.13321	1.86273
RP11-442N24__B.1	1	28968990	28970990	+	4.42038	4.93699	2.89822	1.76959
RNU11	1	28974362	28976362	+	2.96631	4.82082	2.74156	1.95586
GMEB1	1	28994494	28996494	+	9.53872	9.75781	3.28987	2.1887
SCARNA24	1	29015427	29017427	+	0.40714	0.580822	1.17495	0.651954
YTHDF2	1	29062383	29064383	+	8.49179	6.50521	6.57974	2.049
OPRD1	1	29137904	29139904	+	0.756118	0.755069	1.01829	0.74509
RP1-212P9.2	1	29193337	29195337	+	0.290815	0.580822	0.391651	0.372545
RP1-212P9.3	1	29202598	29204598	-	1.1051	0.464658	0.783302	1.1642
Y_RNA	1	29207097	29209097	-	0.872444	1.27781	1.09662	0.698522
EPB41	1	29212853	29214853	+	6.63057	8.13151	4.38649	1.95586
Y_RNA	1	29311472	29313472	+	1.1051	1.21973	0.548311	1.07107
TMEM200B	1	29449197	29451197	-	2.09387	1.68438	2.81989	1.44361
RP11-242O24.3	1	29472256	29474256	-	0.697955	0.755069	0.313321	0.419113
RP11-242O24.5	1	29478251	29480251	+	0.756118	0.813151	0.548311	0.651954
SRSF4	1	29507249	29509249	-	9.77137	10.2225	5.71811	2.88722
RP11-467D18.2	1	29549695	29551695	+	0.697955	0.406575	0.313321	0.605386
MECR	1	29556204	29558204	-	2.79182	2.72986	1.64493	1.30391
PTPRU	1	29562278	29564278	+	3.19896	1.6263	3.68152	1.95586
AL645859.1	1	29578945	29580945	-	0.697955	0.580822	0.313321	0.791658
RP3-437I16.1	1	29675376	29677376	-	0.290815	0.406575	0.939963	0.465681
AC092265.1	1	30116275	30118275	-	0.523466	0.348493	0.548311	0.512249
RP4-656G21.1	1	30181144	30183144	-	0.697955	0.580822	0.626642	0.698522
AL645944.1	1	30356999	30358999	+	0.290815	0.638904	0.783302	0.651954
RP11-111I12.1	1	30509209	30511209	-	0.98877	0.348493	0.234991	0.372545
RP5-893G23.1	1	30612360	30614360	+	0.639792	0.464658	0.234991	0.605386
RP4-591L5.1	1	30883235	30885235	-	0.523466	0.348493	0.391651	0.279409
RP4-591L5.2	1	30887922	30889922	+	0.465303	0.290411	0.469981	0.605386
RP5-1166H10.2	1	31190190	31192190	+	2.67549	2.90411	4.07317	1.21077
MATN1	1	31195184	31197184	-	0.581629	0.638904	0.704972	0.977931
LAPTM5	1	31229417	31231417	-	5.35099	8.59617	2.11492	1.81616
RP5-1125N11.1	1	31287150	31289150	-	0.465303	0.580822	0.626642	0.698522
RP1-65J11.1	1	31296325	31298325	+	1.39591	0.929315	1.17495	1.07107
7SK	1	31315920	31317920	+	0.523466	0.696986	0.861632	0.74509
RP1-65J11.5	1	31330255	31332255	+	0.465303	1.16164	0.391651	0.325977
SDC3	1	31380358	31382358	-	1.97754	1.21973	1.5666	1.11764
SNORD103A	1	31407370	31409370	-	0.930607	0.813151	0.704972	0.884795
SNORD103B	1	31420799	31422799	-	0.465303	1.33589	0.626642	0.838226
SNORD85	1	31439833	31441833	-	0.639792	0.987398	0.469981	0.931363
PUM1	1	31537588	31539588	-	3.83875	6.15671	3.60319	2.00243
NKAIN1	1	31711151	31713151	-	1.51224	1.04548	1.72326	1.0245
SNRNP40	1	31768412	31770412	-	2.96631	4.93699	2.42824	1.21077
ZCCHC17	1	31769092	31771092	+	2.96631	4.64658	2.42824	1.39704
RP11-266K22.2	1	31818396	31820396	-	0.581629	0.638904	0.548311	0.372545
FABP3	1	31848447	31850447	-	0.756118	0.406575	0.469981	0.372545
SERINC2	1	31881662	31883662	+	0.523466	0.348493	0.391651	0.931363
U6	1	31969275	31971275	-	0.523466	0.464658	0.704972	0.698522
RP11-439L8.3	1	31971091	31973091	+	1.16326	1.51014	1.40994	0.931363
RP11-439L8.4	1	31983286	31985286	+	1.16326	0.52274	0.626642	0.419113
RP11-73M7.1	1	32039924	32041924	-	0.523466	0.696986	0.783302	0.419113
TINAGL1	1	32041366	32043366	+	0.523466	0.464658	0.704972	0.512249
HCRTR1	1	32082537	32084537	+	2.32652	0.987398	1.87992	0.931363
PEF1	1	32109247	32111247	-	5.6418	5.51781	2.5849	1.49018
RP11-73M7.6	1	32120960	32122960	+	0.697955	1.10356	0.783302	0.74509
COL16A1	1	32168670	32170670	-	1.68672	1.68438	0.783302	0.977931
BAI2	1	32229244	32231244	-	1.39591	1.27781	1.95826	0.977931
RP11-84A19.3	1	32253981	32255981	+	1.80305	2.20712	2.03659	0.977931
SPOCD1	1	32280402	32282402	-	0.98877	1.10356	1.80159	0.884795
RP11-84A19.2	1	32319919	32321919	-	0.581629	0.755069	0.939963	0.512249
AL136115.1	1	32378424	32380424	+	1.80305	2.14904	0.939963	0.977931
RP4-534N18.2	1	32397871	32399871	+	3.6061	4.12384	1.17495	1.21077
PTP4A2	1	32409207	32411207	-	4.94385	6.33096	2.03659	1.39704
KHDRBS1	1	32478680	32480680	+	11.8071	11.2099	4.54315	1.95586
TMEM39B	1	32536882	32538882	+	2.90815	2.20712	1.95826	1.1642
RP11-277A4.4	1	32537825	32539825	-	3.08263	3.65918	2.66323	1.30391
AL445248.1	1	32543699	32545699	-	0.465303	1.27781	0.469981	0.279409
AL445248.2	1	32544048	32546048	-	0.465303	1.10356	0.469981	0.232841
KPNA6	1	32572889	32574889	+	5.52548	4.00767	2.42824	1.11764
RP4-622L5.2	1	32635584	32637584	+	0.465303	0.464658	0.783302	0.605386
TXLNA	1	32644537	32646537	+	6.45608	7.20219	3.75985	1.90929
CCDC28B	1	32665237	32667237	+	2.21019	4.12384	2.34991	1.1642
IQCC	1	32670486	32672486	+	2.79182	2.72986	1.48827	1.58332
RP4-622L5.7	1	32671165	32673165	-	2.32652	2.38137	0.861632	1.44361
DCDC2B	1	32673945	32675945	+	1.33775	1.27781	0.391651	0.419113
TMEM234	1	32686722	32688722	-	3.78059	6.50521	2.27158	1.30391
EIF3I	1	32686779	32688779	+	3.72243	6.56329	2.19325	1.35048
FAM167B	1	32712084	32714084	+	1.33775	1.27781	1.25328	0.977931
LCK	1	32716090	32718090	+	3.43161	4.99507	0.783302	0.977931
Y_RNA	1	32750912	32752912	-	0.697955	0.464658	0.391651	0.884795
HDAC1	1	32756937	32758937	+	5.58364	5.69206	3.13321	1.21077
RP4-811H24.3	1	32786912	32788912	-	2.26835	2.90411	1.5666	1.35048
MARCKSL1	1	32800730	32802730	-	9.2479	9.17699	5.01313	1.95586
RP4-811H24.9	1	32815014	32817014	-	2.0357	1.80055	1.64493	1.30391
RP4-811H24.10	1	32816105	32818105	+	4.76936	4.47233	3.91651	1.86273
RP4-811H24.8	1	32816372	32818372	+	4.76936	4.41425	3.99484	2.14213
TSSK3	1	32827048	32829048	+	3.08263	1.51014	2.89822	1.25734
RP4-811H24.6	1	32828629	32830629	-	0.523466	0.406575	0.939963	0.791658
BSDC1	1	32859082	32861082	-	3.02447	3.02027	1.80159	1.49018
RP1-27O5.3	1	32929908	32931908	+	0.465303	0.755069	0.861632	1.07107
ZBTB8B	1	32929920	32931920	+	0.465303	0.755069	0.861632	1.07107
ZBTB8A	1	33004278	33006278	+	4.01324	2.96219	2.03659	1.0245
Y_RNA	1	33104802	33106802	+	0.232652	0.52274	0.469981	0.884795
ZBTB8OS	1	33115254	33117254	-	5.69997	8.65425	3.21154	1.95586
RBBP4	1	33115993	33117993	+	5.87445	8.59617	3.13321	1.95586
AC114489.1	1	33128600	33130600	-	0.581629	0.638904	1.01829	0.791658
SYNC	1	33167947	33169947	-	1.27958	1.27781	2.74156	0.651954
RP11-114B7.6	1	33189588	33191588	-	1.04693	0.929315	1.01829	0.884795
KIAA1522	1	33206736	33208736	+	2.73366	1.6263	2.03659	1.07107
S100PBP	1	33281618	33283618	+	6.10711	7.43452	2.50657	1.62988
YARS	1	33282504	33284504	-	7.96832	8.94466	2.97655	2.1887
FNDC5	1	33336833	33338833	-	0.639792	0.929315	1.09662	0.698522
HPCA	1	33350845	33352845	+	0.523466	0.755069	1.33161	0.651954
TMEM54	1	33365789	33367789	-	2.0357	1.10356	1.95826	1.11764
AL031602.1	1	33391145	33393145	+	0.465303	0.464658	0.548311	0.838226
RNF19B	1	33429036	33431036	-	9.53872	6.62137	5.87477	1.72302
RP1-117O3.2	1	33451926	33453926	+	0.697955	1.68438	0.704972	0.651954
AL020995.1	1	33493927	33495927	-	0.930607	1.27781	0.391651	0.838226
AK2	1	33545347	33547347	-	1.45407	1.51014	1.64493	0.977931
ADC	1	33545955	33547955	+	1.45407	1.33589	1.5666	1.0245
TRIM62	1	33646421	33648421	-	2.44284	2.6137	3.83818	2.28184
ZNF362	1	33721396	33723396	+	10.5856	5.80822	2.5849	2.049
RP11-415J8.3	1	33779546	33781546	+	0.348977	0.638904	0.15666	0.558818
7SK	1	33801215	33803215	-	0.465303	0.755069	0.626642	0.884795
RP11-415J8.5	1	33815203	33817203	+	5.1765	4.53041	1.80159	1.53675
PHC2	1	33895403	33897403	-	2.44284	1.33589	2.50657	1.95586
AL138837.1	1	33906462	33908462	-	0.581629	0.580822	0.783302	0.838226
ZSCAN20	1	33937482	33939482	+	1.74489	2.14904	1.64493	1.07107
HMGB4	1	34325326	34327326	+	0.348977	0.52274	0.626642	0.651954
AL121980.1	1	34333804	34335804	+	0.523466	0.580822	0.783302	0.372545
RN5S42	1	34577800	34579800	+	0.40714	0.464658	0.861632	0.512249
CSMD2	1	34630193	34632193	-	1.04693	0.871233	1.17495	0.791658
C1orf94	1	34631734	34633734	+	0.465303	0.348493	0.391651	0.605386
AC115286.1	1	34640300	34642300	-	0.232652	0.464658	0.469981	1.0245
MIR552	1	35134045	35136045	-	0.40714	0.52274	0.861632	0.74509
GJB5	1	35219898	35221898	+	0.465303	0.464658	0.626642	0.558818
GJB4	1	35224592	35226592	+	0.232652	0.348493	0.548311	0.651954
AL121988.1	1	35242995	35244995	-	0.523466	0.871233	0.783302	0.931363
GJB3	1	35246040	35248040	+	0.639792	1.04548	1.17495	1.1642
RP1-34M23.5	1	35252448	35254448	-	0.40714	0.232329	0.548311	0.372545
GJA4	1	35257849	35259849	+	0.98877	0.580822	0.704972	0.791658
RP5-997D16.2	1	35315545	35317545	+	0.465303	0.755069	0.939963	0.791658
C1orf212	1	35324167	35326167	-	3.48977	4.47233	2.27158	1.39704
DLGAP3	1	35393936	35395936	-	3.19896	1.91671	2.19325	1.44361
SNORD112	1	35408607	35410607	+	0.348977	0.638904	1.17495	0.74509
RP11-244H3.1	1	35449664	35451664	-	6.33976	7.02795	3.28987	1.76959
ZMYM6NB	1	35449704	35451704	-	6.33976	6.91178	3.28987	1.76959
ZMYM6	1	35496319	35498319	-	3.89692	4.87891	2.74156	2.049
ZMYM1	1	35524637	35526637	+	0.465303	0.638904	0.469981	0.419113
SFPQ	1	35657499	35659499	-	18.554	17.1923	6.81473	2.32841
Y_RNA	1	35660820	35662820	+	0.465303	0.464658	1.01829	0.791658
ZMYM4	1	35733818	35735818	+	9.07342	10.3967	3.91651	2.00243
AL590434.1	1	35756849	35758849	-	0.523466	0.755069	0.234991	1.1642
SNORA62	1	35775125	35777125	+	0.697955	0.580822	0.861632	1.0245
RP4-765A10.2	1	35830428	35832428	-	1.97754	2.32329	1.40994	1.0245
RNY5P1	1	35892244	35894244	-	0.872444	0.987398	0.313321	0.74509
KIAA0319L	1	36022301	36024301	-	5.93262	6.96987	3.05488	1.11764
NCDN	1	36022324	36024324	+	5.93262	6.96987	3.05488	1.11764
TFAP2E	1	36038221	36040221	+	1.51224	1.16164	1.95826	0.931363
RP4-728D4.2	1	36042080	36044080	-	5.52548	4.58849	3.75985	2.049
RP5-983H21.3	1	36057227	36059227	+	0.814281	0.871233	0.548311	0.791658
PSMB2	1	36106195	36108195	-	3.78059	4.76274	2.03659	1.67645
C1orf216	1	36183823	36185823	-	4.65303	4.64658	3.68152	1.58332
RP11-435D7.3	1	36204240	36206240	+	0.98877	0.464658	0.939963	0.838226
CLSPN	1	36234318	36236318	-	5.29282	5.63397	3.68152	2.049
EIF2C4	1	36273023	36275023	+	8.3173	6.79562	3.83818	2.049
EIF2C1	1	36334659	36336659	+	1.1051	0.755069	0.704972	0.977931
AL139286.1	1	36339585	36341585	-	0.639792	0.464658	1.25328	0.512249
EIF2C3	1	36395569	36397569	+	11.6326	9.52548	5.09146	2.93379
RP4-665N4.4	1	36546673	36548673	-	0.40714	0.929315	0.626642	0.977931
TEKT2	1	36548926	36550926	+	1.80305	1.16164	1.33161	1.07107
ADPRHL2	1	36553726	36555726	+	6.45608	5.80822	4.77814	1.67645
COL8A2	1	36589571	36591571	-	1.91938	0.987398	1.80159	0.791658
TRAPPC3	1	36613848	36615848	-	3.78059	3.54301	2.42824	1.1642
MAP7D1	1	36620430	36622430	+	20.357	13.8236	3.83818	2.09557
THRAP3	1	36689267	36691267	+	3.66426	5.80822	2.42824	1.67645
SH3D21	1	36771238	36773238	+	4.36222	3.13644	3.05488	1.67645
FAM176B	1	36788505	36790505	-	3.6061	2.26521	2.34991	1.44361
AL591845.1	1	36788585	36790585	+	3.66426	2.26521	2.27158	1.49018
STK40	1	36850247	36852247	-	7.09588	5.92439	5.24812	2.14213
LSM10	1	36862243	36864243	-	2.90815	3.54301	2.27158	1.0245
U4	1	36867210	36869210	-	0.98877	1.45206	0.783302	0.512249
SNORA63	1	36882929	36884929	-	0.639792	0.52274	0.15666	0.605386
OSCP1	1	36914836	36916836	-	3.43161	3.19452	1.80159	1.1642
MRPS15	1	36928788	36930788	-	3.25712	5.45973	2.42824	1.30391
CSF3R	1	36947629	36949629	-	1.22142	1.74247	0.861632	0.931363
RP4-614N24.1	1	37237991	37239991	+	0.290815	0.290411	0.548311	0.512249
GRIK3	1	37498480	37500480	-	1.27958	0.638904	2.19325	0.931363
U6	1	37668461	37670461	+	0.814281	0.406575	0.861632	0.651954
RN5S43	1	37729137	37731137	-	0.756118	0.52274	0.939963	0.884795
RP5-1180C18.1	1	37789451	37791451	-	0.465303	0.464658	1.09662	0.605386
RP11-422J8.1	1	37938762	37940762	-	5.1765	5.92439	3.13321	1.72302
ZC3H12A	1	37939403	37941403	+	6.04894	7.26028	2.97655	1.67645
MEAF6	1	37979125	37981125	-	8.25913	7.60877	4.54315	1.62988
SNIP1	1	38018655	38020655	-	3.89692	2.96219	1.48827	1.53675
DNALI1	1	38021770	38023770	+	1.27958	1.33589	1.17495	0.698522
GNL2	1	38060290	38062290	-	1.97754	2.38137	3.21154	1.1642
RSPO1	1	38099345	38101345	-	0.697955	0.696986	2.03659	0.884795
C1orf109	1	38156664	38158664	-	3.1408	4.35617	2.5849	1.0245
CDCA8	1	38157340	38159340	+	3.1408	4.29808	2.50657	0.977931
Y_RNA	1	38202476	38204476	-	0.465303	0.52274	0.234991	0.605386
snoU13	1	38215124	38217124	+	0.756118	0.755069	0.548311	0.977931
EPHA10	1	38229555	38231555	-	0.348977	0.406575	0.783302	0.651954
MANEAL	1	38258724	38260724	+	4.88568	3.71726	3.21154	1.1642
RP11-109P14.9	1	38265301	38267301	-	0.756118	0.290411	0.548311	0.698522
C1orf122	1	38271901	38273901	+	8.49179	5.11123	2.74156	1.62988
YRDC	1	38272607	38274607	-	12.3305	7.8411	5.16979	1.95586
AL929472.1	1	38292636	38294636	-	0.523466	0.638904	0.783302	0.558818
MTF1	1	38324042	38326042	-	3.89692	3.77534	2.66323	1.11764
RP11-109P14.10	1	38325619	38327619	+	1.86121	1.91671	0.861632	0.977931
SNORA63	1	38349159	38351159	+	0.639792	0.755069	0.939963	0.838226
U6	1	38349945	38351945	+	0.814281	0.696986	0.626642	0.605386
INPP5B	1	38411479	38413479	-	2.84998	4.00767	1.87992	1.07107
SF3A3	1	38455343	38457343	-	1.91938	2.14904	1.64493	1.35048
U6	1	38456384	38458384	+	0.930607	1.27781	0.626642	1.72302
FHL3	1	38470028	38472028	-	5.23466	3.6011	1.48827	1.67645
UTP11L	1	38474180	38476180	+	0.581629	1.74247	1.01829	1.21077
POU3F1	1	38511200	38513200	-	5.58364	2.43945	3.3682	2.98036
RP5-884C9.2	1	38512236	38514236	+	4.01324	2.20712	2.66323	2.28184
RP11-214L19.1	1	38679189	38681189	-	0.814281	0.638904	0.861632	0.605386
U6	1	38861581	38863581	+	0.639792	0.52274	0.783302	0.512249
RP11-329N22.1	1	38940118	38942118	+	4.7112	7.37644	1.64493	1.30391
RRAGC	1	39324245	39326245	-	7.38669	6.04055	3.05488	1.72302
RP5-864K19.4	1	39324922	39326922	+	6.80506	5.2274	2.97655	1.25734
MYCBP	1	39346039	39348039	-	0.756118	0.696986	0.783302	0.651954
U6	1	39391792	39393792	+	0.639792	0.52274	0.548311	0.419113
RHBDL2	1	39406221	39408221	-	0.523466	0.638904	0.313321	0.558818
Y_RNA	1	39415347	39417347	-	0.697955	0.987398	0.704972	0.419113
AKIRIN1	1	39456145	39458145	+	10.8183	7.95726	3.3682	1.72302
NDUFS5	1	39491240	39493240	+	3.78059	5.57589	1.87992	1.95586
MACF1	1	39546238	39548238	+	2.73366	1.91671	3.3682	1.62988
U6	1	39585465	39587465	-	0.639792	0.755069	0.783302	0.605386
RN5S44	1	39618718	39620718	-	1.33775	0.929315	0.469981	0.651954
RP11-420K8.1	1	39722071	39724071	-	0.697955	0.580822	0.783302	0.605386
KIAA0754	1	39875401	39877401	+	1.22142	0.813151	0.548311	0.931363
BMP8A	1	39956568	39958568	+	5.75813	3.02027	3.44653	2.09557
TRNAK36P	1	39969445	39971445	+	0.697955	0.406575	0.783302	0.558818
RP11-69E11.4	1	40010609	40012609	-	0.40714	0.871233	0.861632	0.279409
RP11-15J6.1	1	40030082	40032082	+	0.523466	0.987398	0.783302	0.838226
SNORA55	1	40031930	40033930	-	0.98877	0.638904	0.939963	0.74509
PABPC4	1	40041212	40043212	-	11.9816	9.4674	2.66323	1.72302
RP1-144F13.3	1	40098338	40100338	+	0.697955	1.10356	1.40994	0.884795
HEYL	1	40104367	40106367	-	1.74489	1.45206	1.64493	1.35048
NT5C1A	1	40136460	40138460	-	3.08263	2.90411	1.17495	1.44361
HPCAL4	1	40156111	40158111	-	1.33775	0.871233	2.66323	0.838226
PPIE	1	40157104	40159104	+	1.27958	0.638904	2.66323	1.0245
U7	1	40188049	40190049	-	0.98877	1.27781	1.25328	1.0245
OXCT2	1	40235770	40237770	-	2.32652	2.6137	2.27158	0.977931
BMP8B	1	40253283	40255283	-	11.9234	8.8285	3.75985	1.90929
Y_RNA	1	40346100	40348100	-	1.1051	1.51014	0.704972	0.884795
TRIT1	1	40347933	40349933	-	2.84998	2.96219	1.95826	1.11764
RP1-118J21.5	1	40362667	40364667	+	0.40714	0.638904	0.391651	0.465681
MYCL1	1	40366678	40368678	-	4.47854	2.49754	3.44653	1.25734
Y_RNA	1	40409420	40411420	-	0.465303	1.04548	0.783302	0.838226
MFSD2A	1	40420052	40422052	+	3.37345	4.29808	2.81989	1.21077
CAP1	1	40505155	40507155	+	5.81629	7.4926	2.5849	1.90929
PPT1	1	40562125	40564125	-	2.0357	1.80055	2.27158	1.49018
RLF	1	40626295	40628295	+	4.47854	4.29808	2.42824	1.58332
U6	1	40642765	40644765	+	0.697955	0.696986	0.704972	1.1642
TMCO2	1	40710869	40712869	+	0.930607	1.10356	0.391651	0.884795
ZMPSTE24	1	40723029	40725029	+	3.6061	5.63397	2.34991	1.53675
RP1-39G22.5	1	40747236	40749236	+	0.756118	0.987398	0.861632	0.838226
COL9A2	1	40782238	40784238	-	2.61733	1.9748	2.81989	2.00243
SMAP2	1	40809772	40811772	+	1.74489	1.33589	1.01829	1.11764
ZNF643	1	40915024	40917024	+	5.35099	4.64658	3.21154	2.23527
ZNF642	1	40942137	40944137	+	4.88568	4.29808	2.89822	1.76959
RP11-656D10.3	1	40973083	40975083	-	4.12957	2.32329	1.40994	1.30391
DEM1	1	40973663	40975663	+	3.95508	2.20712	1.5666	1.35048
RP11-656D10.5	1	40979479	40981479	-	0.40714	0.348493	0.783302	0.791658
RP11-656D10.6	1	40981596	40983596	-	0.465303	0.290411	0.704972	0.651954
ZNF684	1	40996483	40998483	+	2.26835	3.48493	2.11492	1.35048
AL031289.1	1	41071389	41073389	-	0.348977	0.987398	0.469981	0.698522
RIMS3	1	41130079	41132079	-	3.89692	3.42685	3.13321	1.72302
RP4-739H11.3	1	41152010	41154010	-	0.639792	1.27781	0.626642	0.512249
NFYC	1	41156570	41158570	+	7.91016	7.72493	3.75985	1.76959
MIR30E	1	41219277	41221277	+	0.98877	0.929315	0.548311	1.1642
MIR30C1	1	41222206	41224206	+	0.465303	0.290411	0.548311	0.698522
KCNQ4	1	41248934	41250934	+	3.02447	1.45206	1.72326	1.0245
CITED4	1	41326768	41328768	-	4.30406	2.38137	3.99484	1.1642
RP5-1066H13.4	1	41328836	41330836	+	0.639792	0.580822	1.01829	0.74509
CTPS	1	41444257	41446257	+	12.3887	10.3386	3.21154	2.56125
SLFNL1	1	41487659	41489659	-	0.40714	0.52274	0.626642	0.791658
SCMH1	1	41706576	41708576	-	19.3101	15.4499	6.18809	2.09557
RP11-399E6.1	1	41707295	41709295	+	16.8091	12.4296	5.16979	1.72302
FOXO6	1	41826844	41828844	+	5.58364	3.54301	2.50657	2.23527
RP11-399E6.4	1	41840091	41842091	-	0.290815	0.52274	0.313321	0.512249
RN5S45	1	41931449	41933449	-	0.523466	0.52274	0.469981	0.558818
EDN2	1	41949094	41951094	-	0.814281	0.987398	0.861632	1.07107
RP11-486B10.3	1	42000364	42002364	+	0.232652	0.290411	0.626642	0.558818
HIVEP3	1	42500346	42502346	-	4.36222	3.02027	2.42824	1.76959
GUCA2B	1	42618342	42620342	+	0.523466	0.638904	0.313321	0.512249
GUCA2A	1	42629139	42631139	-	0.174489	0.406575	0.548311	0.651954
AC096540.1	1	42778549	42780549	+	0.290815	1.10356	0.469981	1.07107
FOXJ3	1	42800298	42802298	-	12.1561	11.0937	5.87477	2.37497
RP11-223A3.1	1	42802797	42804797	-	0.639792	0.580822	0.548311	0.698522
RIMKLA	1	42845716	42847716	+	3.89692	2.38137	3.05488	1.62988
ZMYND12	1	42920688	42922688	-	5.99078	6.27288	3.52486	2.00243
PPCS	1	42921038	42923038	+	6.22343	6.91178	3.68152	2.28184
CCDC30	1	42928251	42930251	+	1.86121	1.74247	2.03659	1.35048
U6	1	43033954	43035954	+	0.465303	0.813151	0.391651	0.651954
PPIH	1	43123346	43125346	+	2.61733	3.42685	2.19325	1.30391
RP5-994D16.3	1	43143656	43145656	+	0.756118	0.755069	0.783302	0.884795
YBX1	1	43147348	43149348	+	13.9009	11.7907	4.77814	2.09557
CLDN19	1	43204675	43206675	-	0.639792	0.348493	0.391651	0.931363
RP5-994D16.7	1	43221136	43223136	+	0.116326	0.638904	1.5666	1.1642
LEPRE1	1	43231505	43233505	-	7.27036	7.78302	4.30816	1.53675
C1orf50	1	43232190	43234190	+	6.33976	6.96987	3.83818	1.62988
RP5-994D16.9	1	43241211	43243211	-	0.523466	0.638904	0.626642	0.884795
CCDC23	1	43281704	43283704	-	5.58364	4.93699	3.3682	1.86273
ERMAP	1	43282045	43284045	+	5.81629	5.16932	3.13321	1.72302
RP11-342M1.2	1	43310783	43312783	-	2.96631	3.31069	1.64493	1.35048
RP11-342M1.3	1	43310808	43312808	-	3.02447	3.54301	1.80159	1.35048
RP11-342M1.4	1	43310843	43312843	-	3.08263	3.65918	1.80159	1.35048
ZNF691	1	43311530	43313530	+	2.96631	4.12384	1.80159	1.72302
SLC2A1	1	43423289	43425289	-	10.6438	9.64165	5.24812	1.81616
RP5-848E13.3	1	43423970	43425970	+	8.20097	6.56329	4.54315	1.62988
U6	1	43456359	43458359	+	0.930607	0.696986	0.234991	0.558818
U6	1	43488058	43490058	-	0.465303	0.580822	0.939963	0.465681
FAM183A	1	43609279	43611279	+	0.40714	0.52274	1.09662	0.512249
WDR65	1	43637070	43639070	+	1.68672	2.67178	1.33161	0.884795
RN5S46	1	43661338	43663338	+	0.290815	0.638904	0.548311	0.74509
EBNA1BP2	1	43726339	43728339	-	0.697955	1.04548	0.783302	0.605386
TMEM125	1	43734915	43736915	+	0.581629	0.929315	0.704972	0.558818
C1orf210	1	43750038	43752038	-	0.348977	0.755069	0.548311	0.372545
TIE1	1	43765914	43767914	+	0.756118	0.52274	0.939963	0.279409
MPL	1	43802725	43804725	+	0.756118	0.406575	0.704972	0.558818
RP1-92O14.3	1	43823079	43825079	-	3.25712	4.47233	1.95826	1.1642
CDC20	1	43823849	43825849	+	3.1408	4.35617	1.64493	1.21077
ELOVL1	1	43832447	43834447	-	13.4356	8.71233	5.09146	2.42154
RP1-92O14.6	1	43850034	43852034	+	1.16326	0.406575	0.626642	0.605386
MED8	1	43854229	43856229	-	5.87445	5.69206	3.13321	1.49018
C1orf84	1	43854803	43856803	+	5.75813	5.8663	3.28987	1.62988
SZT2	1	43885678	43887678	+	0.523466	0.406575	0.313321	0.279409
SZT2-AS1	1	43913065	43915065	-	0.40714	0.232329	0.313321	0.372545
HYI	1	43918410	43920410	-	3.72243	3.2526	3.60319	1.25734
RP11-506B15.6	1	43918848	43920848	+	3.83875	3.48493	3.28987	1.39704
PTPRF	1	43990108	43992108	+	0.40714	0.638904	0.391651	0.512249
KDM4A	1	44115079	44117079	+	3.37345	3.65918	2.03659	1.67645
ST3GAL3	1	44170745	44172745	+	1.27958	1.91671	0.704972	0.605386
RP11-184I16.2	1	44172559	44174559	-	9.77137	9.40932	4.07317	2.1887
U6	1	44181388	44183388	+	0.581629	0.755069	0.626642	0.74509
RP11-184I16.4	1	44191764	44193764	-	0.639792	1.21973	0.939963	0.74509
ARTN	1	44398242	44400242	+	1.91938	1.51014	1.95826	1.1642
RP11-7O11.3	1	44410973	44412973	-	7.03771	6.50521	3.28987	1.07107
IPO13	1	44411861	44413861	+	7.09588	6.79562	2.97655	1.39704
DPH2	1	44434922	44436922	+	1.33775	1.80055	1.40994	0.651954
ATP6V0B	1	44439409	44441409	+	6.10711	6.73754	3.75985	2.88722
B4GALT2	1	44443865	44445865	+	6.7469	5.75014	2.27158	1.30391
CCDC24	1	44456281	44458281	+	2.61733	2.49754	2.27158	1.07107
SLC6A9	1	44495889	44497889	-	5.93262	5.63397	4.46482	1.95586
RP5-1198O20.4	1	44508850	44510850	+	0.814281	0.52274	0.548311	0.74509
AL139220.1	1	44581813	44583813	-	0.639792	0.580822	0.469981	0.512249
KLF17	1	44583772	44585772	+	0.697955	0.290411	1.01829	0.465681
Y_RNA	1	44617902	44619902	-	0.98877	0.987398	0.704972	0.558818
DMAP1	1	44678377	44680377	+	3.95508	4.29808	2.03659	1.95586
ERI3-IT1	1	44708695	44710695	-	0.40714	0.638904	0.469981	0.465681
AL390776.1	1	44797600	44799600	-	0.581629	0.348493	0.548311	0.465681
ERI3	1	44819682	44821682	-	4.42038	6.38904	2.27158	1.62988
U6	1	44855644	44857644	+	0.523466	0.638904	0.783302	0.558818
RNF220	1	44870116	44872116	+	1.5704	1.91671	2.97655	1.62988
AL596225.1	1	44967755	44969755	-	0.756118	0.696986	0.939963	0.884795
TMEM53	1	45138977	45140977	-	2.09387	1.74247	2.42824	1.35048
C1orf228	1	45139614	45141614	+	1.74489	1.9748	2.11492	1.44361
RNU5F-1	1	45186324	45188324	-	3.25712	2.78795	1.48827	0.977931
RP4-678E16.4	1	45189429	45191429	+	2.50101	2.55562	2.50657	1.35048
RNU5D-1	1	45195592	45197592	-	4.30406	5.69206	2.03659	1.72302
KIF2C	1	45204740	45206740	+	3.95508	4.58849	2.66323	1.35048
AL592166.1	1	45237565	45239565	+	0.814281	0.871233	1.01829	0.558818
RPS8	1	45240173	45242173	+	7.44485	6.8537	2.34991	2.1887
RP11-269F19.2	1	45240232	45242232	-	7.32853	6.79562	2.42824	2.14213
SNORD46	1	45241412	45243412	+	5.35099	5.75014	2.34991	1.67645
SNORD38A	1	45242765	45244765	+	1.45407	1.45206	1.40994	0.74509
SNORD38B	1	45243312	45245312	+	1.27958	0.929315	0.939963	0.74509
BEST4	1	45252127	45254127	-	1.27958	1.21973	1.64493	0.791658
PLK3	1	45265147	45267147	+	7.96832	6.62137	2.5849	1.95586
TCTEX1D4	1	45271707	45273707	-	5.1765	5.98247	2.5849	1.62988
BTBD19	1	45273404	45275404	+	5.52548	7.26028	2.42824	1.81616
RNU5E-6P	1	45284419	45286419	-	3.31529	3.07836	1.95826	1.58332
PTCH2	1	45307485	45309485	-	2.21019	1.56822	1.40994	1.1642
RN5S47	1	45397245	45399245	+	0.40714	0.813151	1.09662	1.0245
EIF2B3	1	45451032	45453032	-	3.08263	3.13644	1.33161	1.21077
HECTD3	1	45475751	45477751	-	5.87445	6.62137	3.91651	1.90929
UROD	1	45477069	45479069	+	2.0357	3.07836	1.48827	1.25734
AL359540.1	1	45770040	45772040	-	3.1408	2.6137	0.861632	0.977931
ZSWIM5	1	45770631	45772631	-	2.84998	1.74247	0.469981	0.931363
HPDL	1	45791795	45793795	+	4.0714	4.06575	3.28987	1.30391
TOE1	1	45804592	45806592	+	3.6061	6.09863	1.95826	1.58332
MUTYH	1	45804892	45806892	-	3.66426	6.09863	2.03659	1.62988
snoU13	1	45823170	45825170	-	0.465303	0.813151	0.939963	1.0245
TESK2	1	45955622	45957622	-	2.96631	4.00767	2.50657	1.90929
CCDC163P	1	45964501	45966501	-	1.97754	2.67178	1.5666	1.49018
MMACHC	1	45964975	45966975	+	2.44284	2.72986	1.80159	1.44361
PRDX1	1	45987469	45989469	-	2.15203	3.48493	2.27158	1.25734
AKR1A1	1	46015465	46017465	+	4.0714	4.76274	2.11492	1.58332
NASP	1	46048768	46050768	+	4.47854	4.93699	3.05488	1.95586
CCDC17	1	46088479	46090479	-	1.27958	0.987398	1.40994	0.605386
TMEM69	1	46152136	46154136	+	4.88568	5.34356	2.81989	2.1887
GPBP1L1	1	46152535	46154535	-	5.81629	6.2148	2.74156	2.09557
RP11-767N6.7	1	46161497	46163497	-	0.930607	1.04548	0.626642	0.279409
IPP	1	46215072	46217072	-	4.12957	5.57589	2.66323	1.90929
MAST2	1	46251909	46253909	+	0.639792	0.813151	0.861632	0.838226
RP4-533D7.4	1	46511740	46513740	+	0.523466	0.929315	0.548311	0.838226
RP4-533D7.5	1	46598293	46600293	+	3.1408	5.2274	2.42824	1.1642
TSPAN1	1	46639995	46641995	+	0.930607	0.580822	0.704972	0.605386
RP11-322N21.2	1	46640900	46642900	-	0.523466	0.871233	0.861632	0.651954
PIK3R3	1	46640910	46642910	-	0.523466	0.813151	0.861632	0.651954
C1orf190	1	46668256	46670256	+	1.45407	0.696986	1.25328	1.35048
POMGNT1	1	46684727	46686727	-	0.930607	0.464658	0.783302	0.465681
RAD54L	1	46712610	46714610	+	2.61733	3.2526	1.48827	1.44361
LRRC41	1	46768030	46770030	-	12.505	9.35124	4.46482	2.14213
UQCRH	1	46768553	46770553	+	8.49179	7.66685	3.60319	2.14213
NSUN4	1	46805099	46807099	+	4.47854	4.41425	2.27158	1.62988
AL122001.1	1	46823767	46825767	+	0.697955	1.21973	0.783302	0.931363
FAAH	1	46859187	46861187	+	2.15203	1.68438	1.25328	1.21077
RP5-1109J22.2	1	46914126	46916126	-	0.523466	0.52274	0.704972	0.931363
RP5-1109J22.3	1	46920745	46922745	+	0.523466	0.52274	0.469981	0.419113
DMBX1	1	46971918	46973918	+	0.348977	0.290411	0.783302	0.74509
AL136373.1	1	47004856	47006856	-	0.290815	0.406575	0.626642	0.465681
KNCN	1	47015949	47017949	-	0.523466	0.755069	0.234991	0.465681
MKNK1	1	47081265	47083265	-	3.48977	3.42685	1.87992	1.67645
MOB3C	1	47081313	47083313	-	3.43161	3.48493	1.95826	1.62988
ATPAF1-AS1	1	47136750	47138750	+	0.697955	0.755069	0.548311	0.838226
ATPAF1	1	47138289	47140289	-	0.581629	0.406575	0.391651	0.605386
RP11-8J9.4	1	47138958	47140958	+	0.465303	0.464658	0.704972	0.605386
KIAA0494	1	47183574	47185574	-	6.39792	4.24	3.75985	1.44361
CYP4B1	1	47222760	47224760	+	0.697955	0.406575	0.391651	0.558818
CYP4A11	1	47405906	47407906	-	0.465303	0.638904	0.704972	0.651954
CYP4X1	1	47426286	47428286	+	0.872444	0.464658	0.626642	1.0245
CYP4Z1	1	47532410	47534410	+	0.872444	0.232329	0.783302	1.07107
CYP4A22	1	47602357	47604357	+	0.639792	0.52274	0.469981	0.791658
RP1-18D14.3	1	47643693	47645693	-	1.22142	1.68438	1.33161	0.977931
RP1-18D14.4	1	47644172	47646172	+	1.1051	1.6263	1.48827	0.931363
PDZK1IP1	1	47655466	47657466	-	0.348977	0.755069	1.25328	0.465681
RP1-18D14.7	1	47690719	47692719	+	0.697955	0.580822	1.40994	1.11764
TAL1	1	47696642	47698642	-	1.39591	1.04548	1.25328	1.30391
STIL	1	47778569	47780569	-	3.78059	4.70466	2.11492	1.53675
CMPK1	1	47798719	47800719	+	10.2367	9.11891	5.32645	2.1887
RP11-511I2.2	1	47872899	47874899	-	0.639792	0.755069	0.626642	0.651954
FOXE3	1	47880994	47882994	+	0.930607	0.638904	0.861632	0.698522
RP11-511I2.5	1	47899063	47901063	-	0.465303	0.52274	1.01829	0.931363
FOXD2	1	47900939	47902939	+	1.91938	2.09096	1.40994	0.977931
AL356458.1	1	47967426	47969426	+	0.639792	0.290411	0.234991	0.698522
AL591415.1	1	48085599	48087599	-	0.523466	0.232329	0.548311	0.465681
RP11-543D5.1	1	48153385	48155385	+	0.639792	0.406575	0.861632	0.419113
RP11-543D5.2	1	48229969	48231969	-	0.697955	0.290411	0.234991	0.651954
RP11-543D5.3	1	48266045	48268045	-	0.639792	0.406575	0.313321	0.605386
RP11-330M19.1	1	48282988	48284988	+	0.639792	0.638904	0.783302	0.558818
RP4-683M8.2	1	48518467	48520467	+	0.523466	0.406575	0.313321	0.558818
RP11-193P11.3	1	48546618	48548618	-	0.581629	0.638904	0.548311	0.605386
SKINTL	1	48626293	48628293	-	0.40714	1.04548	0.783302	0.605386
RP5-1024N4.2	1	48670887	48672887	+	0.523466	0.696986	0.469981	0.791658
SLC5A9	1	48687607	48689607	+	0.465303	0.348493	0.548311	0.605386
U6	1	48809131	48811131	+	0.40714	0.52274	0.391651	0.698522
U4	1	48912858	48914858	+	0.639792	0.464658	0.469981	0.977931
SPATA6	1	48936595	48938595	-	1.62856	0.755069	1.80159	1.07107
BEND5	1	49243025	49245025	-	0.697955	0.580822	0.704972	0.931363
RP11-141A19.1	1	49513238	49515238	+	0.232652	0.290411	0.548311	0.419113
snoU13	1	49616314	49618314	+	0.465303	0.52274	0.313321	0.838226
RP11-141A19.2	1	49722333	49724333	+	0.581629	0.696986	0.15666	0.651954
AGBL4-IT1	1	49936507	49938507	-	0.348977	0.406575	0.234991	0.605386
AL645730.1	1	50447137	50449137	+	0.348977	0.116164	0.234991	0.512249
AL645730.2	1	50459240	50461240	+	0.116326	0.406575	0.391651	0.419113
AGBL4	1	50488335	50490335	-	0.639792	0.52274	1.40994	1.21077
ELAVL4	1	50512936	50514936	+	0.523466	0.52274	0.861632	0.74509
RP11-567C20.2	1	50640290	50642290	-	0.697955	0.406575	0.626642	0.884795
RP11-567C20.3	1	50687549	50689549	-	0.232652	0.52274	0.704972	0.74509
DMRTA2	1	50887922	50889922	-	1.04693	0.52274	1.48827	1.0245
RP5-850O15.3	1	50926391	50928391	+	0.523466	0.580822	0.861632	0.74509
Y_RNA	1	50964279	50966279	-	0.232652	0.52274	0.783302	0.931363
U6	1	51047326	51049326	+	0.814281	0.813151	1.01829	0.977931
U6	1	51215218	51217218	+	0.465303	0.755069	0.548311	0.838226
FAF1	1	51424685	51426685	-	5.99078	5.63397	2.97655	1.90929
CDKN2C	1	51425667	51427667	+	3.66426	3.13644	2.27158	1.76959
C1orf185	1	51567156	51569156	+	0.98877	0.987398	1.40994	1.07107
Y_RNA	1	51572144	51574144	+	0.756118	0.755069	0.704972	0.651954
AL162430.2	1	51653385	51655385	+	0.40714	0.638904	1.40994	0.838226
AL162430.1	1	51655805	51657805	+	0.465303	0.755069	1.01829	0.698522
snoU13	1	51695778	51697778	-	0.756118	0.580822	1.17495	0.605386
RP11-296A18.3	1	51699518	51701518	-	2.84998	3.07836	2.11492	0.977931
RNF11	1	51701193	51703193	+	9.94586	7.26028	5.01313	1.72302
RP11-296A18.6	1	51729838	51731838	+	0.756118	1.04548	0.939963	1.0245
RP11-296A18.7	1	51730775	51732775	+	1.16326	1.21973	0.704972	0.838226
RP11-275F13.1	1	51794576	51796576	+	2.44284	1.74247	2.11492	1.21077
TTC39A	1	51809538	51811538	-	1.1051	2.38137	1.72326	0.977931
U6	1	51847230	51849230	+	0.581629	0.987398	0.783302	0.838226
RP11-253A20.1	1	51926643	51928643	+	0.814281	0.987398	0.391651	1.11764
RP11-191G24.1	1	51983231	51985231	+	14.0754	11.3841	4.1515	1.81616
EPS15	1	51983750	51985750	-	13.6683	10.8033	4.07317	1.72302
U6	1	52003151	52005151	-	0.639792	0.813151	1.01829	0.74509
OSBPL9	1	52042101	52044101	+	1.22142	0.987398	1.17495	1.11764
SNORA26	1	52189318	52191318	-	0.581629	0.987398	0.704972	0.74509
RP4-657D16.3	1	52258971	52260971	+	0.756118	0.871233	0.861632	0.884795
MIR761	1	52300832	52302832	-	1.33775	1.39397	0.861632	0.651954
Y_RNA	1	52330555	52332555	+	1.80305	1.74247	0.939963	1.21077
NRD1	1	52343227	52345227	-	5.52548	6.33096	1.87992	1.76959
RN5S48	1	52438332	52440332	+	1.1051	1.16164	0.939963	1.11764
RAB3B	1	52455186	52457186	-	2.55917	1.45206	1.48827	0.74509
KTI12	1	52498238	52500238	-	4.88568	5.51781	3.21154	1.30391
RP11-91A18.4	1	52498313	52500313	+	4.65303	5.45973	3.21154	1.44361
RP11-91A18.5	1	52515840	52517840	+	0.697955	0.929315	0.861632	0.605386
TXNDC12	1	52520593	52522593	-	5.29282	5.34356	3.91651	1.21077
BTF3L4	1	52521047	52523047	+	5.11834	4.93699	3.60319	1.39704
ZFYVE9	1	52607296	52609296	+	10.5275	7.43452	4.38649	2.09557
AL139156.1	1	52615026	52617026	+	0.872444	0.755069	0.939963	0.512249
CC2D1B	1	52830615	52832615	-	6.51425	5.2274	4.30816	1.95586
ORC1	1	52868881	52870881	-	4.47854	3.94959	2.74156	1.30391
PRPF38A	1	52869486	52871486	+	4.36222	3.77534	2.5849	1.44361
snoU13	1	52876364	52878364	+	0.756118	0.696986	0.626642	0.698522
ZCCHC11	1	53017909	53019909	-	9.01525	9.06082	3.52486	2.74752
GPX7	1	53067294	53069294	+	9.2479	5.40165	3.60319	1.62988
FAM159A	1	53098266	53100266	+	5.11834	3.36877	2.81989	1.44361
SELRC1	1	53162788	53164788	-	3.25712	4.35617	2.5849	1.30391
AC099784.1	1	53179321	53181321	+	0.581629	1.10356	0.313321	0.791658
ZYG11B	1	53191376	53193376	+	6.86322	7.02795	3.68152	1.44361
U2	1	53219244	53221244	+	0.639792	1.21973	0.704972	0.791658
U6	1	53269634	53271634	-	0.581629	0.464658	0.469981	0.931363
ZYG11A	1	53307433	53309433	+	4.88568	4.76274	3.60319	1.81616
RP4-631H13.2	1	53346138	53348138	+	0.523466	0.464658	0.548311	0.791658
ECHDC2	1	53391634	53393634	-	2.84998	1.51014	2.27158	1.25734
SCP2	1	53392151	53394151	+	3.02447	1.74247	3.05488	1.53675
AL445183.1	1	53459698	53461698	-	0.581629	0.464658	0.783302	0.372545
PODN	1	53527104	53529104	+	1.16326	0.638904	2.27158	1.25734
RP11-334A14.5	1	53549924	53551924	-	0.872444	0.755069	0.313321	0.558818
RP11-334A14.8	1	53579498	53581498	+	0.465303	0.871233	0.626642	0.419113
SLC1A7	1	53607039	53609039	-	0.290815	0.638904	0.469981	0.558818
CPT2	1	53661351	53663351	+	7.56118	6.09863	3.68152	1.44361
RP5-1024G6.2	1	53678197	53680197	-	0.581629	0.987398	0.704972	0.838226
C1orf123	1	53685039	53687039	-	3.6061	4.18192	4.1515	1.90929
MAGOH	1	53703032	53705032	-	2.21019	2.38137	1.25328	1.1642
RP5-1024G6.5	1	53703532	53705532	+	2.09387	2.38137	1.33161	1.25734
RP4-784A16.1	1	53732857	53734857	+	0.40714	0.638904	0.548311	0.838226
RP4-784A16.2	1	53752946	53754946	+	0.40714	0.929315	0.469981	0.838226
RP4-784A16.3	1	53756560	53758560	-	1.04693	1.56822	0.783302	0.605386
RP4-784A16.4	1	53769458	53771458	+	0.523466	0.52274	0.469981	0.512249
LRP8	1	53792492	53794492	-	7.03771	5.57589	2.89822	1.62988
RP4-784A16.5	1	53793171	53795171	+	5.6418	4.24	2.27158	1.21077
RP11-117D22.1	1	53813655	53815655	-	0.465303	0.755069	0.469981	0.605386
RP11-117D22.2	1	53832667	53834667	-	1.1051	1.39397	0.861632	0.698522
DMRTB1	1	53924322	53926322	+	0.639792	0.290411	0.626642	0.558818
U7	1	54153235	54155235	-	0.232652	0.116164	0.783302	0.419113
GLIS1	1	54198627	54200627	-	0.348977	0.696986	0.783302	0.372545
SNORA58	1	54235576	54237576	-	0.697955	0.755069	1.01829	0.884795
AL049745.1	1	54275197	54277197	+	0.581629	0.755069	1.17495	0.651954
TMEM48	1	54303283	54305283	-	5.40915	6.38904	2.97655	1.25734
YIPF1	1	54355157	54357157	-	2.32652	3.83343	1.64493	1.0245
DIO1	1	54356162	54358162	+	0.814281	1.85863	0.626642	0.884795
HSPB11	1	54410725	54412725	-	10.2948	7.60877	5.79643	2.70095
LRRC42	1	54411000	54413000	+	10.1785	7.43452	5.48311	2.70095
AL031427.1	1	54447167	54449167	+	0.814281	1.04548	1.17495	0.74509
LDLRAD1	1	54482606	54484606	-	0.523466	0.174247	0.704972	0.605386
TMEM59	1	54517927	54519927	-	3.72243	4.82082	1.95826	1.49018
TCEANC2	1	54518510	54520510	+	3.48977	4.29808	2.03659	1.72302
AL161915.1	1	54569218	54571218	+	0.465303	0.52274	0.469981	0.698522
CDCP2	1	54618193	54620193	-	0.348977	0.580822	0.313321	0.605386
AL357673.1	1	54636747	54638747	-	0.290815	0.464658	0.391651	0.465681
MRPL37	1	54648964	54650964	+	0.348977	0.638904	0.469981	0.558818
CYB5RL	1	54664459	54666459	-	3.1408	3.42685	1.95826	1.1642
RP11-446E24.4	1	54664496	54666496	-	3.19896	3.48493	1.87992	1.25734
RP5-997D24.5	1	54689906	54691906	-	0.465303	0.755069	0.234991	0.74509
C1orf191	1	54702960	54704960	+	0.581629	0.813151	0.313321	0.931363
RP5-997D24.3	1	54750328	54752328	+	0.523466	1.04548	0.861632	0.558818
SSBP3	1	54877902	54879902	-	0.523466	0.871233	1.48827	0.698522
RP4-705F19.1	1	54881179	54883179	+	0.348977	0.638904	1.33161	0.512249
RP5-866L20.1	1	54981682	54983682	-	0.465303	0.406575	1.09662	0.74509
SNORD112	1	54990309	54992309	+	0.290815	0.406575	0.939963	0.838226
ACOT11	1	55007180	55009180	+	2.15203	2.20712	2.03659	1.1642
RP11-240D10.2	1	55074113	55076113	+	0.523466	0.406575	0.548311	0.279409
FAM151A	1	55087979	55089979	-	0.523466	0.987398	0.313321	0.512249
RP11-240D10.4	1	55092861	55094861	-	0	0.464658	0.313321	0.186273
HEATR8	1	55106709	55108709	+	0.639792	0.638904	0.469981	0.465681
TTC4	1	55180745	55182745	+	2.09387	1.91671	1.64493	0.931363
PARS2	1	55228937	55230937	-	2.32652	2.72986	2.42824	1.72302
RP11-67L3.2	1	55257808	55259808	+	0.465303	0.406575	0.548311	0.512249
TTC22	1	55265690	55267690	-	2.32652	3.6011	2.5849	1.39704
C1orf177	1	55270986	55272986	+	1.16326	0.755069	1.09662	0.698522
RP11-67L3.6	1	55314822	55316822	-	0.581629	0.290411	0.391651	0.558818
DHCR24	1	55351671	55353671	-	7.67751	8.07343	3.83818	1.76959
RP11-67L3.5	1	55351798	55353798	+	7.61934	8.24767	3.91651	1.76959
RP11-67L3.4	1	55352486	55354486	+	6.10711	6.44712	3.52486	1.86273
TMEM61	1	55445715	55447715	+	0.639792	0.813151	0.861632	0.791658
RP11-12C17.2	1	55456697	55458697	-	0.639792	0.406575	0.626642	0.465681
BSND	1	55463856	55465856	+	0.348977	0.464658	0.783302	0.558818
PCSK9	1	55504471	55506471	+	0.814281	0.755069	0.234991	0.838226
USP24	1	55679789	55681789	-	17.6815	12.8942	4.54315	2.42154
AC091609.1	1	55680331	55682331	+	17.2744	12.4296	4.69981	2.51468
RP11-101C11.1	1	55682784	55684784	+	1.1051	0.52274	0.548311	0.791658
AL049710.3	1	55837127	55839127	-	0.465303	0.52274	0.313321	0.465681
AL049710.1	1	55837853	55839853	-	0.697955	0.232329	0.548311	0.419113
AL049710.2	1	55838361	55840361	+	0.581629	0.116164	0.626642	0.558818
7SK	1	55841275	55843275	-	0.348977	0.348493	0.626642	0.838226
U6	1	55863437	55865437	+	0.232652	0.580822	0.313321	0.465681
Y_RNA	1	55949395	55951395	-	0.290815	0.290411	0.861632	0.465681
RP11-466L17.1	1	56045960	56047960	+	0.348977	0.406575	0.469981	0.512249
RP11-90C4.1	1	56288730	56290730	+	0.814281	0.290411	0.626642	0.558818
RP11-90C4.2	1	56409386	56411386	-	0.465303	0.406575	0.704972	0.465681
RP11-90C4.3	1	56410010	56412010	+	0.697955	0.52274	0.626642	0.74509
RP1-158P9.1	1	56610643	56612643	+	0.639792	0.638904	0.704972	0.558818
RP4-710M16.2	1	56879885	56881885	+	0.697955	0.464658	0.469981	0.372545
PPAP2B	1	57109724	57111724	-	1.80305	1.39397	0.783302	1.25734
PRKAA2	1	57110245	57112245	+	1.80305	1.45206	0.626642	1.25734
C1orf168	1	57284119	57286119	-	0.697955	0.696986	0.548311	0.651954
RP11-378I13.1	1	57291343	57293343	-	0.174489	0.696986	0.548311	0.698522
C8A	1	57319729	57321729	+	0.814281	0.580822	1.01829	0.651954
RP5-1103B4.3	1	57428809	57430809	+	0.465303	0.638904	0.469981	0.139704
C8B	1	57430563	57432563	-	0.40714	0.580822	0.626642	0.698522
AL161740.1	1	57431203	57433203	+	0.465303	0.464658	0.548311	0.698522
RP6-239D12.1	1	57456273	57458273	+	1.1051	0.348493	0.469981	0.698522
RP6-102O10.1	1	57851498	57853498	+	0.40714	0.348493	0.469981	0.558818
AL137855.1	1	58222006	58224006	+	0.756118	0.638904	0.548311	0.698522
RP4-737A23.2	1	58325465	58327465	+	0.174489	0.174247	0.626642	1.0245
RP4-737A23.3	1	58343224	58345224	+	0.639792	0.638904	0.704972	0.698522
RP11-393I23.4	1	58525061	58527061	+	0.639792	0.52274	0.626642	0.419113
DAB1	1	59011156	59013156	-	3.43161	5.45973	2.34991	1.0245
OMA1	1	59011224	59013224	-	3.48977	5.40165	2.34991	1.0245
AL035411.1	1	59030351	59032351	-	0.523466	0.290411	1.17495	0.698522
TACSTD2	1	59041916	59043916	-	5.6418	5.2274	2.89822	1.58332
MYSM1	1	59164514	59166514	-	2.84998	3.31069	1.64493	1.0245
Y_RNA	1	59187201	59189201	+	1.04693	0.987398	1.25328	0.605386
AL136985.1	1	59212913	59214913	+	0.697955	0.696986	0.783302	0.791658
JUN	1	59248535	59250535	-	6.16527	7.43452	2.81989	1.81616
RP4-794H19.2	1	59250073	59252073	+	4.01324	6.04055	1.80159	1.62988
RP11-63G10.2	1	59315676	59317676	-	0.639792	0.813151	1.33161	0.651954
RP4-794H19.1	1	59361125	59363125	-	1.1051	1.27781	1.33161	0.651954
RP4-794H19.4	1	59485309	59487309	+	4.01324	3.83343	1.48827	1.25734
RP11-145M4.1	1	59520471	59522471	-	0.98877	0.813151	0.704972	1.1642
RP11-145M4.2	1	59542538	59544538	-	0.814281	1.04548	0.783302	0.977931
RP11-145M4.3	1	59552617	59554617	-	0.697955	0.464658	0.391651	0.884795
RP11-470E16.1	1	59663043	59665043	-	0.523466	0.580822	0.548311	0.651954
FGGY	1	59761717	59763717	+	4.12957	4.99507	3.3682	2.14213
RP4-782L23.1	1	60237717	60239717	+	0.98877	0.696986	0.861632	0.931363
RP4-782L23.2	1	60253604	60255604	-	0.290815	0.580822	0.861632	0.74509
HOOK1	1	60279708	60281708	+	0.872444	1.04548	1.72326	0.838226
CYP2J2	1	60391212	60393212	-	0.697955	0.987398	1.33161	0.838226
C1orf87	1	60538192	60540192	-	0.348977	0.755069	0.626642	0.558818
RP11-575B7.3	1	60579797	60581797	+	0.348977	0.464658	0.704972	0.419113
RP11-776H12.1	1	61104913	61106913	-	0.756118	0.406575	0.548311	0.605386
RP11-436K8.1	1	61290006	61292006	-	0.40714	0.232329	0.626642	0.512249
NFIA	1	61330181	61332181	+	0.40714	0.580822	0.548311	0.372545
RP4-668G5.1	1	61435198	61437198	-	0.581629	0.638904	0.939963	0.74509
RP5-833A20.1	1	61717932	61719932	-	0.290815	0.696986	0.391651	0.605386
TM2D1	1	62189845	62191845	-	3.1408	5.11123	2.19325	1.76959
INADL	1	62207399	62209399	+	5.99078	3.2526	2.34991	1.25734
U6	1	62281341	62283341	+	0.523466	0.696986	0.469981	0.977931
U6	1	62317421	62319421	+	0.523466	0.232329	0.861632	0.558818
AL136458.1	1	62537370	62539370	+	0.523466	0.464658	0.548311	0.419113
RP4-537K17.2	1	62583431	62585431	-	0.697955	0.580822	0.469981	0.791658
L1TD1	1	62659753	62661753	+	0.697955	0.813151	1.17495	0.698522
Y_RNA	1	62676479	62678479	+	0.348977	0.406575	0.861632	0.558818
U6	1	62762678	62764678	-	0.697955	0.406575	0.783302	0.791658
KANK4	1	62783835	62785835	-	0.697955	0.464658	0.626642	0.838226
USP1	1	62901218	62903218	+	8.25913	8.53809	3.52486	1.72302
ANGPTL3	1	63062408	63064408	+	0.930607	0.871233	0.939963	0.651954
DOCK7	1	63152719	63154719	-	9.42239	7.66685	3.75985	1.86273
RP11-230B22.1	1	63153403	63155403	+	8.84076	7.14411	3.52486	1.81616
ATG4C	1	63249056	63251056	+	4.12957	4.58849	2.34991	1.49018
RP4-771M4.3	1	63360930	63362930	+	0.639792	0.406575	1.09662	0.651954
RP11-5P4.1	1	63476892	63478892	-	0.639792	0.755069	0.704972	0.605386
RP11-5P4.2	1	63489128	63491128	+	0.756118	0.580822	0.783302	0.838226
AL162400.1	1	63543452	63545452	-	0.290815	0.406575	0.783302	0.325977
RP11-335E6.2	1	63604171	63606171	+	0.290815	0.696986	0.313321	0.977931
RN5S49	1	63650871	63652871	-	0.930607	0.696986	0.704972	0.791658
AC096543.1	1	63703864	63705864	+	0.872444	0.871233	0.469981	0.838226
RP11-335E6.3	1	63714944	63716944	+	0.465303	0.116164	0.391651	0.232841
LINC00466	1	63781652	63783652	-	1.33775	1.21973	2.97655	1.11764
FOXD3	1	63787980	63789980	+	4.36222	2.09096	3.13321	1.81616
RP4-792G4.2	1	63788862	63790862	-	2.15203	0.929315	2.34991	1.25734
Y_RNA	1	63803184	63805184	+	0.930607	0.696986	0.704972	0.372545
ALG6	1	63832511	63834511	+	4.82752	3.65918	3.21154	1.81616
EFCAB7	1	63988293	63990293	+	3.6061	5.75014	2.34991	1.49018
U7	1	64001191	64003191	-	0.756118	0.638904	1.01829	1.0245
DLEU2L	1	64013885	64015885	+	0.465303	1.04548	0.548311	1.44361
ITGB3BP	1	64058142	64060142	-	5.29282	4.00767	4.1515	1.58332
PGM1	1	64058166	64060166	+	5.40915	4.00767	4.07317	1.62988
AL109925.1	1	64120676	64122676	+	0.348977	0.871233	0.469981	0.791658
ROR1	1	64238943	64240943	+	4.12957	3.42685	2.42824	1.30391
U6	1	64493422	64495422	-	0.40714	0.464658	0.704972	0.838226
Y_RNA	1	64531163	64533163	-	0.697955	0.464658	0.548311	0.651954
RP11-24J23.2	1	64635730	64637730	-	1.27958	1.45206	1.09662	0.791658
UBE2U	1	64668560	64670560	+	0.581629	0.580822	1.17495	0.605386
RNU7-62P	1	64848892	64850892	-	0.581629	0.755069	0.469981	0.698522
CACHD1	1	64935678	64937678	+	1.51224	1.45206	2.5849	1.1642
RAVER2	1	65210028	65212028	+	2.96631	1.85863	1.5666	1.0245
JAK1	1	65430937	65432937	-	13.3775	11.4422	4.1515	2.46811
RP11-182I10.3	1	65466909	65468909	-	2.67549	2.72986	2.27158	1.11764
U6	1	65487507	65489507	-	0.581629	0.813151	0.626642	0.698522
MIR101-1	1	65522941	65524941	-	0.232652	0.290411	1.09662	0.977931
RP4-535B20.1	1	65532170	65534170	-	6.7469	4.87891	4.54315	1.76959
AL357078.1	1	65590955	65592955	+	0.756118	0.638904	0.861632	0.419113
AK4	1	65612482	65614482	+	2.84998	2.49754	2.97655	2.14213
DNAJC6	1	65713152	65715152	+	0.581629	0.580822	0.939963	0.838226
RP5-1044H5.1	1	65770954	65772954	-	0.872444	0.696986	0.783302	0.512249
AL355487.1	1	65816891	65818891	-	0.348977	0.580822	0.391651	0.884795
U2	1	65880749	65882749	+	0.872444	0.348493	0.548311	0.791658
LEPR	1	65885498	65887498	+	5.00201	4.29808	3.60319	2.00243
LEPROT	1	65885520	65887520	+	4.94385	4.29808	3.44653	2.049
RP4-630A11.3	1	65951339	65953339	+	0.814281	0.580822	0.626642	0.838226
snoU13	1	66036482	66038482	+	0.814281	0.813151	0.626642	0.791658
AL513493.1	1	66225782	66227782	-	0.639792	0.580822	0.313321	0.651954
PDE4B	1	66257447	66259447	+	0.930607	0.755069	1.25328	0.931363
RP11-397C12.1	1	66515151	66517151	-	0.40714	0.348493	0.939963	0.372545
U4	1	66558979	66560979	-	0.639792	0.290411	0.861632	1.21077
SGIP1	1	66998316	67000316	+	0.523466	0.755069	1.09662	0.791658
AL139147.1	1	67141460	67143460	-	0.756118	0.813151	0.626642	1.0245
TCTEX1D1	1	67217392	67219392	+	1.16326	0.871233	1.5666	1.0245
RP11-266I14.3	1	67239979	67241979	+	0.40714	0.406575	0.626642	0.791658
INSL5	1	67265689	67267689	-	0.756118	0.174247	0.391651	0.838226
RP11-342H21.2	1	67291875	67293875	+	0.756118	0.406575	0.626642	0.419113
WDR78	1	67389320	67391320	-	4.24589	3.65918	2.5849	1.62988
MIER1	1	67389828	67391828	+	4.30406	4.06575	2.5849	1.62988
SLC35D1	1	67518532	67520532	-	9.2479	7.89918	2.34991	2.00243
SNORA31	1	67567212	67569212	-	0.639792	0.638904	0.783302	0.698522
C1orf141	1	67599389	67601389	-	0.756118	0.638904	0.626642	0.791658
IL23R	1	67631333	67633333	+	2.0357	1.85863	1.25328	1.49018
U6	1	67661073	67663073	+	0.98877	1.33589	1.01829	0.884795
AL109843.1	1	67703960	67705960	-	1.04693	0.987398	1.01829	0.884795
U4atac	1	67732159	67734159	-	0.930607	0.580822	0.626642	0.698522
IL12RB2	1	67772297	67774297	+	5.46731	3.36877	1.87992	1.30391
U6	1	67882147	67884147	+	0.872444	1.04548	0.783302	0.791658
SERBP1	1	67894848	67896848	-	4.47854	5.75014	2.34991	1.86273
RP4-763G1.2	1	67994563	67996563	+	0.581629	0.813151	0.391651	0.698522
U6	1	68006060	68008060	+	0.40714	0.52274	0.391651	0.512249
AL139258.1	1	68121561	68123561	-	0.581629	0.290411	0.626642	0.651954
GADD45A	1	68149994	68151994	+	6.68874	4.58849	4.85647	1.44361
RNU7-80P	1	68237086	68239086	-	0.697955	0.464658	0.313321	0.419113
RP11-518D3.1	1	68297236	68299236	+	1.5704	1.04548	1.80159	0.884795
GNG12	1	68297900	68299900	-	1.68672	1.04548	2.19325	0.698522
AL157407.1	1	68461216	68463216	-	0.756118	0.464658	0.548311	0.791658
DIRAS3	1	68516064	68518064	-	0.523466	0.174247	0.15666	0.419113
MIR1262	1	68648043	68650043	-	0.523466	0.871233	0.626642	0.74509
WLS	1	68697553	68699553	-	0.639792	0.580822	0.626642	0.791658
RPE65	1	68914392	68916392	-	0.581629	0.464658	0.391651	0.512249
RP4-694A7.2	1	68944062	68946062	+	0.639792	0.464658	0.861632	0.372545
RP4-694A7.4	1	68961609	68963609	+	2.96631	2.38137	1.80159	1.72302
DEPDC1	1	68961654	68963654	-	2.96631	2.32329	1.80159	1.72302
RP11-424D14.1	1	69520831	69522831	+	0.697955	0.755069	0.783302	0.465681
RP11-74K19.1	1	69713856	69715856	-	0.40714	0.464658	0.469981	1.0245
RP3-380B4.1	1	69898188	69900188	+	0.930607	0.580822	1.09662	0.931363
LRRC7	1	70033331	70035331	+	0.639792	0.929315	0.313321	0.931363
AL391728.1	1	70344524	70346524	+	0.756118	0.52274	0.939963	0.465681
RP11-181B18.1	1	70495655	70497655	-	0.639792	0.813151	0.626642	1.11764
RP4-677H15.2	1	70612054	70614054	+	0.756118	0.52274	0.861632	0.931363
AL353771.1	1	70644872	70646872	-	0.639792	0.755069	0.626642	0.884795
LRRC40	1	70670053	70672053	-	3.89692	3.77534	2.11492	1.90929
SRSF11	1	70670615	70672615	+	3.83875	4.00767	2.27158	1.58332
RP4-677H15.4	1	70685456	70687456	-	3.1408	2.84603	2.11492	0.977931
ANKRD13C	1	70819167	70821167	-	5.23466	5.80822	3.05488	1.76959
HHLA3	1	70819738	70821738	+	4.53671	5.05315	3.21154	1.62988
RP11-180O5.2	1	70824870	70826870	-	0.756118	0.929315	0.704972	0.605386
CTH	1	70876151	70878151	+	4.0714	3.48493	2.19325	1.49018
RP5-952N6.1	1	71171386	71173386	+	0.523466	0.464658	0.704972	0.605386
RP11-99H8.1	1	71184722	71186722	-	0.40714	0.464658	0.704972	0.977931
RP3-333A15.1	1	71412312	71414312	+	0.756118	0.406575	0.939963	0.419113
PTGER3	1	71512241	71514241	-	1.22142	1.16164	1.33161	1.11764
RP11-108P2.1	1	71513788	71515788	+	0.930607	0.696986	1.17495	0.931363
MIR186	1	71532149	71534149	-	0.639792	0.813151	0.939963	0.977931
ZRANB2	1	71545730	71547730	-	4.30406	5.2274	1.95826	1.0245
RP11-386O9.1	1	71546257	71548257	+	3.72243	5.16932	1.87992	1.11764
RP11-386O9.2	1	71715932	71717932	+	0.348977	0.580822	0.704972	1.07107
RP11-316C12.2	1	71866780	71868780	+	0.814281	0.638904	0.469981	0.977931
RP11-82L20.1	1	72035889	72037889	+	0.697955	0.871233	0.469981	0.977931
RP11-175G14.1	1	72301445	72303445	-	0.465303	0.638904	0.548311	0.698522
NEGR1	1	72747167	72749167	-	1.16326	1.04548	2.03659	1.11764
U6	1	73182202	73184202	-	0.639792	0.464658	0.548311	0.931363
RP11-262K1.1	1	73240204	73242204	+	0.639792	0.638904	0.939963	0.605386
RP4-660H19.1	1	73363573	73365573	-	0.465303	0.580822	0.15666	0.605386
7SK	1	73656288	73658288	-	0.639792	0.755069	0.704972	0.74509
RP4-598G3.1	1	73771103	73773103	+	0.465303	0.464658	0.313321	0.605386
RP11-275A6.1	1	74100149	74102149	+	0.814281	0.638904	0.391651	0.232841
RP11-275A6.2	1	74174301	74176301	+	0.756118	0.580822	0.548311	0.512249
RN5S50	1	74214056	74216056	-	0.40714	0.871233	0.704972	0.791658
U4atac	1	74348646	74350646	+	0.639792	0.696986	0.313321	0.931363
LRRIQ3	1	74662621	74664621	-	3.19896	3.36877	1.72326	1.39704
FPGT	1	74663172	74665172	+	3.31529	3.54301	1.72326	1.0245
RP11-653A5.2	1	74663176	74665176	+	3.31529	3.54301	1.72326	1.0245
FPGT-TNNI3K	1	74663187	74665187	+	3.31529	3.54301	1.72326	1.0245
RP11-439H8.4	1	74843236	74845236	-	0.116326	0.290411	0.469981	0.651954
RP4-650F12.2	1	74933129	74935129	+	0.697955	0.871233	1.25328	0.838226
LRRC53	1	74977048	74979048	-	0.581629	0.52274	0.548311	0.325977
RP4-612J11.1	1	75054669	75056669	+	0.756118	0.755069	1.01829	0.605386
C1orf173	1	75138172	75140172	-	2.73366	1.33589	1.5666	1.11764
AC091611.1	1	75186966	75188966	-	0.290815	0.929315	1.33161	0.884795
CRYZ	1	75197842	75199842	-	4.30406	5.45973	3.13321	1.81616
TYW3	1	75198086	75200086	+	4.12957	4.93699	2.89822	1.67645
RP11-17E13.3	1	75216809	75218809	-	0.756118	0.638904	0.626642	0.791658
RP11-93N20.1	1	75428248	75430248	+	0.40714	0.929315	0.626642	0.558818
LHX8	1	75593369	75595369	+	0.523466	0.290411	0.626642	0.651954
RP11-510C10.3	1	75597011	75599011	-	0.348977	0.290411	0.861632	0.512249
RP11-510C10.2	1	75597493	75599493	-	0.232652	0.348493	0.861632	0.372545
U6	1	75647980	75649980	+	0.348977	0.638904	0.704972	0.74509
U6	1	76002554	76004554	-	0.40714	0.638904	0.626642	0.558818
SLC44A5	1	76075551	76077551	-	0.697955	0.813151	1.01829	0.698522
RP4-682C21.5	1	76188446	76190446	-	4.30406	3.6011	1.95826	1.58332
ACADM	1	76189286	76191286	+	6.97955	5.8663	2.34991	1.76959
RABGGTB	1	76251129	76253129	+	4.24589	5.57589	2.34991	1.25734
SNORD45C	1	76252007	76254007	+	3.31529	3.65918	1.40994	1.1642
SNORD45A	1	76252824	76254824	+	2.67549	2.96219	1.01829	0.931363
SNORD45B	1	76254412	76256412	+	2.15203	3.31069	1.17495	1.21077
MSH4	1	76261817	76263817	+	0.639792	1.04548	0.548311	0.791658
ASB17	1	76396866	76398866	-	0.872444	0.290411	0.939963	0.884795
RP11-550H2.1	1	76476259	76478259	+	0.639792	0.929315	0.704972	0.465681
RP11-550H2.2	1	76506626	76508626	+	0.98877	0.52274	0.704972	0.698522
ST6GALNAC3	1	76539639	76541639	+	1.51224	0.755069	1.64493	1.21077
U6	1	77218070	77220070	+	0.98877	0.464658	0.626642	0.698522
RP11-415A20.1	1	77243702	77245702	-	0.98877	0.638904	1.17495	0.651954
ST6GALNAC5	1	77332376	77334376	+	1.1051	0.580822	1.40994	0.558818
RP4-706A16.2	1	77532855	77534855	+	0.523466	0.406575	0.469981	0.419113
PIGK	1	77683865	77685865	-	1.97754	3.13644	1.40994	1.21077
AK5	1	77746986	77748986	+	1.51224	1.04548	1.95826	1.44361
RP11-375A5.1	1	77814020	77816020	-	0.697955	0.464658	0.626642	0.698522
AC095030.1	1	77855963	77857963	-	0.232652	0.406575	1.25328	1.07107
U7	1	77885260	77887260	+	0.930607	0.987398	0.704972	0.791658
RN5S20	1	78079804	78081804	+	1.04693	0.813151	0.939963	1.11764
AC114487.1	1	78110259	78112259	+	0.581629	0.638904	0.783302	1.0245
ZZZ3	1	78147854	78149854	-	9.42239	7.8411	4.9348	1.62988
USP33	1	78224287	78226287	-	5.81629	4.99507	4.22983	1.67645
FAM73A	1	78244559	78246559	+	3.19896	3.54301	1.48827	1.39704
RN5S21	1	78244839	78246839	+	3.1408	3.54301	1.72326	1.39704
NEXN	1	78353448	78355448	+	2.44284	2.43945	2.27158	1.21077
NEXN-AS1	1	78353974	78355974	-	2.26835	2.43945	1.80159	1.30391
FUBP1	1	78443544	78445544	-	3.54794	4.93699	2.42824	1.53675
DNAJB4	1	78444109	78446109	+	4.12957	5.28548	2.03659	1.49018
GIPC2	1	78444476	78446476	+	3.72243	4.82082	1.64493	1.44361
U6	1	78553517	78555517	-	0.872444	0.348493	0.626642	0.838226
RN5S22	1	78559349	78561349	-	0.581629	0.813151	0.626642	0.977931
RP11-183M13.1	1	78694533	78696533	+	0.290815	0.348493	0.783302	0.74509
PTGFR	1	78768818	78770818	+	0.639792	0.755069	0.783302	0.558818
RN5S23	1	78839703	78841703	-	0.581629	0.464658	0.548311	0.698522
AL354946.1	1	79047580	79049580	+	0.697955	0.348493	0.469981	0.74509
IFI44L	1	79084857	79086857	+	3.72243	4.76274	1.95826	1.62988
IFI44	1	79114731	79116731	+	2.61733	3.13644	1.5666	1.35048
AC104837.1	1	79151995	79153995	+	0.465303	0.871233	1.40994	1.1642
ELTD1	1	79471153	79473153	-	0.40714	0.580822	1.01829	0.558818
RP4-726F1.1	1	79788704	79790704	+	0.348977	0.52274	0.861632	0.931363
RP11-339D23.1	1	80839056	80841056	-	0.523466	0.638904	0.704972	0.884795
RP5-887A10.1	1	81000690	81002690	+	0.581629	0.52274	0.626642	0.74509
RP11-115A15.1	1	81048798	81050798	-	0.814281	0.174247	0.704972	0.512249
7SK	1	81716724	81718724	+	0.872444	0.580822	0.626642	0.651954
LPHN2	1	81771095	81773095	+	0.98877	0.755069	1.25328	0.558818
RP5-837I24.6	1	81970034	81972034	+	0.756118	0.638904	1.01829	0.838226
RP5-837I24.2	1	82022137	82024137	-	0.98877	0.755069	0.469981	0.74509
RP5-837I24.4	1	82090148	82092148	-	0.581629	0.348493	0.469981	0.605386
RP11-147G16.1	1	82725567	82727567	-	0.697955	0.696986	0.861632	0.419113
RP4-601K24.1	1	83368116	83370116	+	0.116326	0.116164	0.469981	0.931363
RP11-170N11.1	1	83450641	83452641	-	0.290815	0.464658	0.0783302	0.791658
RP11-413G15.1	1	83910986	83912986	+	0.581629	0.638904	0.704972	0.605386
RP5-836J3.1	1	84255213	84257213	+	0.348977	0.929315	0.548311	1.11764
AL035706.1	1	84258810	84260810	+	0.98877	0.52274	0.704972	0.651954
RP11-475O6.1	1	84325456	84327456	-	1.86121	1.04548	2.97655	1.35048
TTLL7-IT1	1	84448733	84450733	-	0.581629	0.580822	0.939963	0.558818
TTLL7	1	84463583	84465583	-	3.19896	2.32329	2.03659	1.67645
PRKACB	1	84542995	84544995	+	6.39792	5.8663	3.75985	2.1887
SNORA2	1	84742254	84744254	+	0.697955	0.871233	0.939963	0.651954
SAMD13	1	84763299	84765299	+	2.96631	2.78795	2.5849	1.49018
AL359273.1	1	84854295	84856295	-	0.872444	1.80055	1.01829	1.11764
DNASE2B	1	84863465	84865465	+	0.232652	0.755069	0.861632	0.372545
RPF1	1	84944192	84946192	+	2.38468	3.13644	2.03659	0.977931
GNG5	1	84970998	84972998	-	9.36423	9.23507	3.13321	2.56125
CTBS	1	85038913	85040913	-	6.10711	6.96987	3.60319	1.76959
C1orf180	1	85099453	85101453	-	0.581629	0.580822	0.783302	0.605386
SSX2IP	1	85155236	85157236	-	8.89893	7.60877	4.07317	2.23527
AC104169.1	1	85257632	85259632	-	0.40714	0.464658	0.861632	0.977931
LPAR3	1	85357646	85359646	-	1.5704	0.755069	1.72326	0.977931
MCOLN2	1	85461546	85463546	-	6.04894	5.75014	3.91651	1.67645
WDR63	1	85464080	85466080	+	1.97754	1.74247	1.48827	0.372545
MCOLN3	1	85512932	85514932	-	6.16527	4.58849	3.28987	1.81616
SYDE2	1	85665479	85667479	-	8.08465	5.8663	6.03143	2.60782
C1orf52	1	85724105	85726105	-	1.62856	2.67178	2.42824	0.698522
Y_RNA	1	85729229	85731229	+	0.523466	0.929315	1.01829	0.419113
RP11-131L23.1	1	85741648	85743648	+	3.25712	3.94959	2.89822	0.977931
BCL10	1	85742521	85744521	-	1.22142	1.74247	1.40994	0.465681
Y_RNA	1	85899717	85901717	-	0.697955	0.696986	0.861632	0.74509
DDAH1	1	86042796	86044796	-	1.33775	0.929315	1.40994	1.11764
CYR61	1	86045694	86047694	+	1.62856	1.74247	2.34991	1.35048
SNORD81	1	86057213	86059213	+	0.523466	0.987398	0.861632	0.977931
RP11-290M5.2	1	86064064	86066064	+	0.40714	0.406575	0.548311	0.791658
ZNHIT6	1	86172866	86174866	-	2.96631	4.82082	1.64493	1.21077
RN5S51	1	86348231	86350231	-	0.465303	0.638904	0.626642	0.605386
COL24A1	1	86621376	86623376	-	1.04693	0.987398	1.95826	1.07107
ODF2L	1	86860775	86862775	-	2.67549	2.49754	1.80159	0.977931
CLCA2	1	86889019	86891019	+	0.40714	0.580822	1.25328	0.605386
CLCA1	1	86933301	86935301	+	0.40714	0.871233	0.313321	0.931363
CLCA4	1	87012011	87014011	+	0.697955	0.290411	1.09662	0.791658
AL356270.1	1	87071203	87073203	+	0.40714	0.52274	1.25328	0.838226
RP4-651E10.4	1	87157636	87159636	-	0.930607	0.813151	0.861632	0.558818
SH3GLB1	1	87169509	87171509	+	11.1091	9.11891	5.32645	1.81616
RP4-604K5.1	1	87378857	87380857	-	5.06017	5.45973	3.68152	1.53675
HS2ST1	1	87379581	87381581	+	5.11834	5.57589	3.44653	1.25734
RP4-604K5.2	1	87409175	87411175	-	0.98877	0.755069	1.01829	0.605386
AL139139.1	1	87616231	87618231	+	2.44284	2.67178	2.50657	1.1642
LMO4	1	87793401	87795401	+	9.59688	8.53809	3.13321	2.1887
RP4-544H6.2	1	87836088	87838088	-	0.523466	0.290411	0.391651	0.465681
RN5S52	1	87917806	87919806	-	0.697955	1.04548	0.704972	0.884795
RP5-1027O11.1	1	88370147	88372147	-	1.04693	0.813151	0.783302	0.651954
AL445438.1	1	88942551	88944551	-	0.639792	0.580822	0.626642	0.558818
PKN2	1	89149155	89151155	+	3.31529	7.20219	3.75985	2.37497
RP11-76N22.2	1	89149637	89151637	-	3.19896	6.04055	3.99484	2.1887
U6	1	89281712	89283712	+	0.930607	0.232329	0.469981	0.74509
GTF2B	1	89356377	89358377	-	2.90815	3.54301	2.19325	1.11764
CCBL2	1	89457386	89459386	-	7.03771	7.14411	3.21154	1.81616
RBMXL1	1	89457393	89459393	-	7.03771	7.20219	3.21154	1.81616
Y_RNA	1	89484798	89486798	-	0.98877	0.348493	0.861632	0.651954
GBP3	1	89487299	89489299	-	3.54794	2.78795	1.5666	1.58332
AL160008.1	1	89487430	89489430	+	3.37345	2.84603	1.64493	1.35048
GBP1	1	89529793	89531793	-	2.67549	2.72986	1.25328	1.58332
GBP2	1	89614889	89616889	-	0.523466	0.755069	0.626642	0.74509
GBP7	1	89640473	89642473	-	0.581629	0.813151	0.626642	0.558818
GBP4	1	89663365	89665365	-	3.08263	3.36877	1.95826	1.35048
RP4-620F22.2	1	89725515	89727515	+	0.697955	0.696986	0.391651	1.1642
GBP5	1	89737294	89739294	-	2.44284	1.80055	1.09662	1.11764
GBP6	1	89828855	89830855	+	1.51224	1.56822	1.01829	0.977931
LRRC8B	1	89989645	89991645	+	6.39792	6.2148	3.60319	2.28184
RP5-1007M22.3	1	90049297	90051297	+	0.98877	0.580822	0.548311	0.931363
RP11-413E1.4	1	90094534	90096534	+	1.91938	1.74247	0.469981	1.1642
RP5-1007M22.2	1	90097203	90099203	-	13.2611	7.89918	2.97655	2.28184
LRRC8C	1	90097881	90099881	+	14.7734	9.93206	3.60319	2.32841
snoU13	1	90232627	90234627	-	0.814281	0.580822	0.939963	0.698522
RP5-943J3.1	1	90253723	90255723	+	0.523466	0.696986	0.783302	0.419113
LRRC8D	1	90285823	90287823	+	11.051	8.8285	4.62148	1.90929
RP11-302M6.2	1	90421031	90423031	-	0.756118	1.51014	0.861632	0.512249
7SK	1	90452253	90454253	-	0.814281	0.813151	1.25328	1.1642
ZNF326	1	90456972	90458972	+	0.639792	0.290411	0.626642	0.791658
RP11-302M6.4	1	90467498	90469498	-	1.04693	1.6263	0.861632	1.07107
U6	1	90717867	90719867	-	0.697955	0.813151	1.09662	0.838226
RP5-827O9.1	1	90997779	90999779	-	0.465303	0.987398	0.469981	0.884795
U3	1	91122557	91124557	+	0.465303	0.290411	0.548311	0.651954
BARHL2	1	91181544	91183544	-	0.465303	0.580822	1.17495	1.0245
RP4-665J23.1	1	91315957	91317957	-	2.61733	2.09096	2.19325	1.21077
RP4-665J23.2	1	91316566	91318566	+	2.38468	1.74247	1.95826	0.74509
ZNF644	1	91486579	91488579	-	10.702	8.71233	3.21154	2.23527
Y_RNA	1	91726432	91728432	+	0.465303	0.52274	1.17495	0.977931
AC098691.1	1	91851699	91853699	-	6.22343	4.58849	7.98968	7.4509
HFM1	1	91869176	91871176	-	1.68672	1.56822	1.95826	1.72302
CDC7	1	91965654	91967654	+	3.83875	5.11123	2.27158	1.90929
AL390780.1	1	92294339	92296339	-	1.04693	0.696986	1.09662	0.791658
TGFBR3	1	92370642	92372642	-	0.814281	0.52274	0.469981	0.698522
AC114486.1	1	92409914	92411914	-	0.40714	0.348493	0.469981	0.651954
BRDT	1	92414178	92416178	+	0.523466	0.464658	0.391651	0.512249
EPHX4	1	92494789	92496789	+	1.51224	1.45206	1.25328	1.53675
BTBD8	1	92545112	92547112	+	1.51224	1.45206	1.80159	1.58332
KIAA1107	1	92631792	92633792	+	0.756118	0.290411	0.704972	0.884795
C1orf146	1	92682747	92684747	+	0.697955	0.406575	0.548311	0.838226
GLMN	1	92763294	92765294	-	4.47854	4.64658	3.68152	1.30391
RPAP2	1	92763772	92765772	+	4.30406	4.82082	3.68152	1.35048
AC104456.1	1	92866992	92868992	-	0.581629	0.232329	0.469981	0.651954
AC104456.2	1	92888579	92890579	+	0.98877	0.638904	0.704972	1.0245
GFI1	1	92951183	92953183	-	13.0285	10.1644	4.46482	2.00243
U4	1	93165241	93167241	-	0.581629	0.929315	0.939963	0.698522
EVI5	1	93256711	93258711	-	0.581629	0.290411	0.469981	0.977931
RPL5	1	93296847	93298847	+	3.43161	5.05315	2.5849	0.931363
SNORD21	1	93302096	93304096	+	1.51224	1.10356	1.5666	0.977931
SNORA66	1	93302825	93304825	+	1.1051	0.987398	1.25328	1.30391
SNORA66	1	93305526	93307526	+	0.756118	0.464658	0.939963	0.884795
SNORA51	1	93310866	93312866	+	0.465303	0.696986	0.704972	0.791658
FAM69A	1	93425829	93427829	-	17.3326	13.4751	3.99484	2.79409
U6	1	93434017	93436017	-	1.62856	1.51014	1.33161	0.884795
AC093577.3	1	93439430	93441430	-	3.89692	7.89918	2.03659	1.72302
AC093577.1	1	93446615	93448615	-	2.38468	2.49754	1.95826	1.0245
U6	1	93475064	93477064	+	0.465303	0.638904	0.861632	0.838226
7SK	1	93491059	93493059	+	0.98877	0.696986	0.626642	0.791658
AC093577.2	1	93491688	93493688	+	0.756118	0.580822	0.626642	0.698522
Y_RNA	1	93491813	93493813	-	0.756118	0.580822	0.548311	0.605386
MTF2	1	93544042	93546042	+	4.01324	5.16932	2.74156	1.11764
AC093577.4	1	93568509	93570509	-	1.04693	0.871233	0.783302	0.74509
CCDC18	1	93644726	93646726	+	6.7469	5.63397	3.05488	2.28184
TMED5	1	93645035	93647035	-	6.80506	5.45973	3.05488	2.23527
RP4-717I23.3	1	93810332	93812332	-	8.66628	11.5003	4.38649	1.86273
DR1	1	93810695	93812695	+	9.13158	11.3841	4.46482	1.86273
Y_RNA	1	93850518	93852518	+	0.523466	0.406575	0.626642	0.465681
FNBP1L	1	93912908	93914908	+	2.21019	2.03288	3.3682	1.58332
RN5S53	1	93952759	93954759	-	0.40714	0.406575	1.09662	0.74509
RP5-1033H22.2	1	94057006	94059006	+	0.930607	0.638904	0.783302	0.74509
RP11-488P3.1	1	94239750	94241750	-	0.581629	0.696986	0.861632	0.605386
BCAR3	1	94311456	94313456	-	7.79383	6.79562	4.77814	2.46811
MIR760	1	94311638	94313638	+	7.79383	6.79562	4.9348	2.70095
DNTTIP2	1	94344224	94346224	-	2.79182	4.35617	1.48827	1.35048
GCLM	1	94373716	94375716	-	10.5275	6.62137	3.91651	2.09557
AL117351.4	1	94386361	94388361	-	0.697955	0.464658	0.704972	0.605386
AL117351.5	1	94386419	94388419	-	0.697955	0.406575	0.704972	0.605386
AL117351.1	1	94386486	94388486	-	0.697955	0.406575	0.704972	0.605386
AL117351.3	1	94388677	94390677	-	0.639792	0.929315	0.391651	0.931363
AL117351.6	1	94398760	94400760	+	0.639792	0.464658	0.626642	0.605386
AL117351.2	1	94398921	94400921	+	0.697955	0.52274	0.783302	0.651954
AL117351.7	1	94398996	94400996	+	0.756118	0.52274	0.783302	0.651954
ABCA4	1	94585438	94587438	-	0.348977	0.638904	0.783302	0.651954
RP11-78O9.1	1	94609917	94611917	+	0.756118	0.290411	0.626642	1.0245
snoU13	1	94616224	94618224	+	0.523466	0.929315	0.15666	0.605386
RP11-148B18.1	1	94712714	94714714	+	2.21019	1.45206	2.27158	1.39704
ARHGAP29	1	94739374	94741374	-	0.348977	0.464658	0.548311	0.791658
RP11-148B18.4	1	94788875	94790875	-	0.581629	0.52274	0.626642	0.838226
RP11-148B18.3	1	94798073	94800073	+	0.98877	0.929315	0.861632	0.884795
ABCD3	1	94883183	94885183	+	4.24589	5.40165	3.44653	1.81616
F3	1	95006106	95008106	-	2.32652	1.91671	2.66323	1.30391
RP11-86H7.6	1	95056603	95058603	-	0.465303	0.696986	0.469981	0.605386
RP11-86H7.7	1	95088490	95090490	-	0.40714	0.52274	0.626642	0.605386
RP11-86H7.1	1	95284587	95286587	-	0.756118	0.813151	1.33161	0.977931
SLC44A3	1	95285148	95287148	+	0.697955	0.52274	1.40994	0.74509
RP11-465K1.2	1	95319732	95321732	-	0.697955	0.638904	1.17495	0.74509
CNN3	1	95391584	95393584	-	2.73366	1.74247	3.05488	1.49018
RP4-639F20.1	1	95392372	95394372	+	2.0357	1.56822	1.5666	1.25734
RP4-639F20.3	1	95491509	95493509	-	0.872444	0.580822	0.469981	0.465681
RP11-313A24.1	1	95526402	95528402	+	0.639792	0.232329	0.469981	0.698522
ALG14	1	95537251	95539251	-	2.90815	3.31069	2.27158	1.07107
TMEM56	1	95582144	95584144	+	3.25712	2.38137	2.50657	1.53675
RP11-57H12.2	1	95584953	95586953	+	0.581629	0.232329	0.626642	1.0245
Y_RNA	1	95589915	95591915	-	0.465303	0.580822	0.469981	0.651954
RP11-57H12.3	1	95698288	95700288	-	2.73366	2.90411	3.05488	1.21077
RWDD3	1	95698961	95700961	+	3.08263	3.54301	3.05488	1.30391
RP11-57H12.5	1	95728360	95730360	-	0.465303	0.52274	0.469981	0.651954
RP4-586O15.1	1	95782569	95784569	-	0.348977	0.406575	0.234991	0.465681
RP11-14O19.1	1	95816560	95818560	-	0.232652	0.464658	0.469981	0.279409
RP11-14O19.2	1	95845306	95847306	-	0.639792	0.232329	0.626642	0.512249
RP4-617C6.1	1	95939543	95941543	+	0.814281	0.52274	0.313321	0.558818
AL356479.1	1	95969369	95971369	-	0.465303	0.638904	0.548311	0.419113
RP11-286B14.1	1	95974966	95976966	+	0.465303	0.406575	0.391651	0.605386
AC092812.1	1	96351346	96353346	+	0.348977	0.406575	0.704972	1.0245
RP11-147C23.1	1	96402707	96404707	+	0.523466	0.464658	0.626642	0.512249
U1	1	96690707	96692707	+	0.40714	0.174247	0.469981	0.512249
RP5-898J17.1	1	96838431	96840431	-	0.523466	0.406575	0.313321	0.931363
AL139347.1	1	97048018	97050018	+	0.523466	0.638904	0.861632	0.512249
7SK	1	97160473	97162473	-	0.232652	0.580822	0.704972	0.791658
PTBP2	1	97186471	97188471	+	5.23466	5.05315	2.89822	1.58332
AL592205.1	1	97367505	97369505	+	0.40714	0.638904	0.548311	0.74509
DPYD-AS1	1	97560729	97562729	+	0.639792	0.52274	0.391651	0.512249
DPYD-IT1	1	97884447	97886447	-	0.290815	0.174247	0.704972	0.651954
DPYD-AS2	1	98261727	98263727	+	0.930607	1.10356	0.939963	0.838226
DPYD	1	98385355	98387355	-	2.61733	2.90411	1.95826	1.49018
MIR137	1	98510477	98512477	-	1.1051	0.580822	1.72326	0.74509
MIR137HG	1	98513911	98515911	-	0.756118	0.232329	0.626642	0.465681
RP5-1070A16.1	1	98675553	98677553	+	0.290815	0.406575	0.704972	0.74509
AL160056.1	1	98838191	98840191	+	0.639792	0.696986	0.469981	0.558818
SNX7	1	99126486	99128486	+	1.27958	1.21973	1.33161	1.39704
RP5-896L10.1	1	99469082	99471082	+	1.04693	0.52274	1.40994	1.1642
LPPR5	1	99469338	99471338	-	0.930607	0.580822	1.48827	1.25734
RP4-788L13.1	1	99728759	99730759	+	0.581629	0.52274	1.40994	0.605386
RP11-413P11.1	1	99998321	100000321	-	0.465303	0.813151	0.861632	0.605386
PALMD	1	100110749	100112749	+	0.523466	0.290411	0.234991	0.605386
FRRS1	1	100230937	100232937	-	2.84998	3.02027	1.33161	1.30391
U4	1	100249191	100251191	-	2.61733	2.72986	1.33161	1.76959
Y_RNA	1	100256468	100258468	+	0.872444	0.580822	0.469981	0.791658
AL451051.1	1	100294271	100296271	+	0.98877	0.348493	0.704972	0.325977
AGL	1	100314890	100316890	+	4.7112	4.24	2.81989	1.95586
RP5-884G6.2	1	100434170	100436170	-	5.69997	4.58849	3.05488	1.86273
SLC35A3	1	100434595	100436595	+	6.28159	4.47233	3.28987	2.1887
U6	1	100443745	100445745	+	0.756118	0.464658	0.783302	0.838226
U6	1	100465045	100467045	-	0.348977	0.696986	1.25328	1.21077
HIAT1	1	100502903	100504903	+	10.7601	12.5458	3.28987	2.42154
RP4-714D9.2	1	100548777	100550777	-	1.22142	0.813151	1.09662	1.11764
SASS6	1	100597261	100599261	-	4.36222	3.71726	2.03659	1.72302
CCDC76	1	100597956	100599956	+	3.78059	3.13644	2.42824	1.76959
LRRC39	1	100642521	100644521	-	0.697955	0.638904	0.548311	0.977931
DBT	1	100714140	100716140	-	2.73366	2.09096	1.5666	1.44361
RP11-305E17.6	1	100730426	100732426	-	3.31529	3.19452	1.72326	0.698522
RTCD1	1	100731013	100733013	+	3.25712	3.71726	1.72326	0.74509
MIR553	1	100746047	100748047	+	0.523466	0.464658	0.861632	0.465681
RP5-837M10.2	1	100809283	100811283	+	0.465303	0.696986	0.861632	1.11764
CDC14A	1	100809834	100811834	+	0.348977	0.755069	1.09662	1.0245
AC104457.1	1	100843081	100845081	-	1.74489	1.27781	1.25328	1.39704
RP5-837M10.4	1	100950303	100952303	-	0.814281	0.813151	1.01829	0.791658
GPR88	1	101002943	101004943	+	1.74489	1.45206	2.27158	1.11764
RP11-84O12.4	1	101093250	101095250	-	0.814281	0.52274	0.861632	0.465681
VCAM1	1	101184555	101186555	+	1.86121	2.14904	1.09662	0.791658
EXTL2	1	101360304	101362304	-	4.94385	5.11123	2.81989	2.09557
SLC30A7	1	101360882	101362882	+	4.24589	4.82082	2.34991	1.90929
RP11-421L21.2	1	101460279	101462279	+	1.33775	1.10356	1.25328	0.931363
DPH5	1	101490394	101492394	-	3.72243	4.99507	1.5666	1.49018
RP11-421L21.3	1	101490659	101492659	+	4.01324	4.99507	1.5666	1.39704
SCARNA16	1	101597959	101599959	+	0.930607	0.929315	0.783302	0.791658
snoU13	1	101693071	101695071	-	1.04693	0.813151	1.01829	0.74509
RP4-575N6.4	1	101700834	101702834	-	4.59487	6.38904	2.19325	1.11764
S1PR1	1	101701694	101703694	+	4.76936	6.15671	2.27158	1.0245
RP11-157N3.1	1	101788143	101790143	+	0.98877	0.813151	0.391651	0.605386
RP11-411H5.1	1	102188548	102190548	+	0.639792	0.406575	1.48827	0.698522
U6	1	102193043	102195043	-	0.697955	0.813151	0.704972	0.931363
U6	1	102324657	102326657	+	0.639792	0.52274	0.626642	0.558818
OLFM3	1	102461336	102463336	-	0.174489	0.52274	0.469981	0.651954
RP11-202K23.1	1	102853936	102855936	-	0.40714	0.52274	0.626642	0.838226
RP5-936J12.1	1	103318148	103320148	-	0.756118	1.10356	0.783302	0.74509
COL11A1	1	103572802	103574802	-	0.40714	0.52274	0.704972	0.838226
RP11-347K2.1	1	103817019	103819019	+	0.290815	0.348493	0.391651	0.419113
RP11-347K2.2	1	103834736	103836736	-	0.232652	0.406575	0.313321	0.279409
RP11-153F1.2	1	103956751	103958751	+	0.40714	0.406575	0.313321	0.232841
7SK	1	104065434	104067434	+	0.697955	0.348493	0.939963	0.74509
RP11-153F1.1	1	104066865	104068865	-	2.38468	3.48493	1.87992	1.1642
RNPC3	1	104067563	104069563	+	3.31529	4.12384	1.87992	1.21077
AMY2B	1	104095687	104097687	+	0.581629	0.580822	0.861632	0.512249
AMY2A	1	104159249	104161249	+	0.174489	0.232329	0.391651	0.186273
AMY1A	1	104197162	104199162	+	0.465303	0.638904	0.626642	0.698522
AMY1B	1	104238052	104240052	-	0.523466	0.929315	0.783302	0.512249
AMY1C	1	104292278	104294278	+	0.174489	0.52274	0.704972	0.325977
RP11-364B6.1	1	104614895	104616895	+	0.290815	0.52274	0.861632	0.325977
RP11-251P6.1	1	106160307	106162307	-	0.348977	0.580822	0.626642	0.884795
RP11-24P14.1	1	106564584	106566584	-	0.697955	0.755069	0.783302	1.0245
RP5-947P14.1	1	106615119	106617119	+	1.22142	0.464658	0.391651	0.791658
AL627169.2	1	107345024	107347024	-	0.465303	0.406575	0.391651	0.651954
AL627169.3	1	107345767	107347767	-	0.465303	0.52274	0.469981	0.558818
AL627169.1	1	107346273	107348273	+	0.465303	0.406575	0.313321	0.512249
RP11-233E12.1-001	1	107360111	107362111	+	0.40714	0.871233	0.548311	0.465681
PRMT6	1	107598517	107600517	+	3.83875	5.40165	3.21154	1.95586
NTNG1	1	107681879	107683879	+	1.62856	1.10356	1.01829	0.791658
AC114491.1	1	107989927	107991927	-	0.290815	0.696986	1.01829	0.884795
AC114491.2	1	108112302	108114302	-	0.465303	0.580822	0.469981	0.325977
RP11-356N1.1	1	108506315	108508315	+	9.59688	6.33096	3.3682	2.049
VAV3	1	108506516	108508516	-	9.48056	6.09863	3.28987	1.90929
RP11-356N1.2	1	108613354	108615354	+	0.523466	0.755069	0.783302	0.605386
SLC25A24	1	108741648	108743648	-	4.24589	2.43945	2.97655	2.00243
NBPF4	1	108785453	108787453	-	0.697955	0.52274	0.861632	0.558818
RP11-483I13.4	1	108814815	108816815	+	1.97754	1.33589	1.64493	1.35048
RP11-483I13.2	1	108815061	108817061	-	1.74489	1.16164	1.5666	1.35048
NBPF6	1	108917671	108919671	+	0.639792	0.580822	0.313321	0.74509
NBPF5	1	108917710	108919710	+	0.639792	0.580822	0.234991	0.791658
RP11-131J3.1	1	108962561	108964561	+	1.04693	1.10356	1.40994	1.1642
FAM102B	1	109101961	109103961	+	4.01324	3.36877	2.5849	1.62988
HENMT1	1	109202898	109204898	-	5.99078	4.24	3.52486	2.09557
PRPF38B	1	109234195	109236195	+	5.75813	6.27288	2.74156	1.58332
FNDC7	1	109254529	109256529	+	0.348977	0.813151	1.01829	0.698522
RP11-293A10.3	1	109277644	109279644	-	0.523466	0.813151	0.469981	0.512249
STXBP3	1	109288546	109290546	+	5.52548	6.44712	2.5849	2.1887
RP11-475E11.5	1	109399089	109401089	+	1.04693	0.406575	0.626642	1.07107
GPSM2	1	109417222	109419222	+	0.581629	1.39397	0.548311	0.791658
AKNAD1	1	109504856	109506856	-	5.93262	5.69206	3.28987	1.95586
CLCC1	1	109504861	109506861	-	5.93262	5.69206	3.28987	1.95586
WDR47	1	109583600	109585600	-	4.01324	3.36877	3.28987	1.53675
TAF13	1	109617374	109619374	-	3.78059	3.65918	1.72326	1.49018
TMEM167B	1	109632607	109634607	+	3.83875	4.35617	2.11492	1.72302
SCARNA2	1	109642065	109644065	+	4.01324	6.38904	2.34991	1.44361
C1orf194	1	109655229	109657229	-	1.86121	2.55562	1.64493	1.25734
KIAA1324	1	109655551	109657551	+	1.74489	2.49754	1.80159	1.1642
U7	1	109749220	109751220	-	0.639792	0.871233	0.548311	0.977931
SARS	1	109755790	109757790	+	3.54794	4.29808	3.05488	1.72302
CELSR2	1	109791891	109793891	+	2.73366	2.03288	1.25328	1.58332
PSRC1	1	109824558	109826558	-	2.79182	3.02027	2.27158	0.931363
MYBPHL	1	109848413	109850413	-	0.697955	0.52274	0.861632	0.931363
SORT1	1	109939323	109941323	-	4.59487	1.85863	2.19325	1.25734
AL356735.1	1	109964373	109966373	+	1.04693	0.755069	1.01829	0.838226
PSMA5	1	109967812	109969812	-	4.59487	4.99507	1.87992	1.1642
SYPL2	1	110008430	110010430	+	1.22142	0.929315	2.66323	0.931363
ATXN7L2	1	110025351	110027351	+	3.83875	3.65918	1.80159	1.0245
CYB561D1	1	110035924	110037924	+	3.31529	3.02027	2.97655	1.1642
AMIGO1	1	110051110	110053110	-	4.42038	3.54301	2.5849	1.95586
GPR61	1	110081744	110083744	+	0.40714	0.464658	0.861632	0.512249
RP5-1160K1.8	1	110085209	110087209	-	0.639792	0.348493	0.783302	0.512249
GNAI3	1	110090483	110092483	+	3.83875	4.93699	1.40994	1.62988
RNU6V	1	110133012	110135012	-	1.04693	0.580822	0.861632	1.07107
RP5-1160K1.3	1	110138097	110140097	+	0.697955	0.406575	0.626642	0.698522
MIR197	1	110140763	110142763	+	0.872444	0.52274	1.09662	0.605386
GNAT2	1	110154429	110156429	-	0.697955	0.232329	0.234991	0.465681
AMPD2	1	110157976	110159976	+	1.39591	1.51014	0.626642	1.0245
RP5-1160K1.6	1	110171677	110173677	-	0.348977	0.464658	0.704972	0.651954
GSTM4	1	110197953	110199953	+	2.61733	3.42685	1.17495	1.25734
GSTM2	1	110209894	110211894	+	1.62856	1.80055	1.5666	1.0245
GSTM1	1	110229686	110231686	+	0.872444	1.74247	0.548311	0.465681
RP4-735C1.4	1	110229700	110231700	+	0.872444	1.74247	0.548311	0.465681
GSTM5	1	110254127	110256127	+	0.697955	1.10356	0.861632	0.512249
GSTM3	1	110283134	110285134	-	0.872444	0.696986	1.09662	0.74509
EPS8L3	1	110305399	110307399	-	1.33775	0.929315	1.17495	0.838226
RP4-735C1.6	1	110370227	110372227	+	0.348977	0.871233	0.391651	0.698522
RP11-195M16.1	1	110427636	110429636	-	0.872444	1.04548	0.704972	0.977931
CSF1	1	110452114	110454114	+	9.18974	6.91178	2.5849	1.81616
AHCYL1	1	110526558	110528558	+	7.38669	5.69206	3.3682	1.58332
FAM40A	1	110573449	110575449	+	1.68672	1.6263	0.783302	0.605386
RP4-773N10.5	1	110583043	110585043	+	0.348977	0.290411	0.469981	0.279409
RP4-773N10.4	1	110600212	110602212	+	0.581629	0.638904	0.469981	0.325977
ALX3	1	110611984	110613984	-	1.68672	0.755069	1.48827	1.07107
RP4-773N10.6	1	110624560	110626560	+	0.98877	0.813151	1.25328	0.838226
UBL4B	1	110654312	110656312	+	0.523466	0.232329	0.783302	0.558818
SLC6A17	1	110692358	110694358	+	0.930607	0.813151	1.48827	1.30391
RP5-1028L10.1	1	110713861	110715861	-	0.40714	0.580822	0.626642	0.558818
RP5-1028L10.2	1	110720091	110722091	-	0.40714	0.348493	0.469981	0.558818
KCNC4-AS1	1	110751359	110753359	-	7.2122	6.33096	4.1515	1.53675
KCNC4	1	110753215	110755215	+	6.51425	5.75014	3.91651	2.32841
SNORA25	1	110814356	110816356	+	0.465303	0.348493	0.469981	0.651954
RBM15	1	110880378	110882378	+	5.93262	6.33096	4.1515	2.00243
RP5-1074L1.1	1	110880543	110882543	-	6.16527	6.8537	4.07317	1.81616
SLC16A4	1	110932454	110934454	-	0.639792	0.696986	1.09662	0.465681
HBXIP	1	110949314	110951314	-	3.89692	3.89151	1.5666	1.07107
RP11-225L12.2	1	110949397	110951397	+	3.95508	3.89151	1.64493	1.11764
PROK1	1	110993072	110995072	+	0.465303	0.52274	0.15666	0.651954
RP11-470L19.2	1	111031630	111033630	-	0.581629	0.638904	0.704972	0.419113
KCNA10	1	111060547	111062547	-	0.348977	0.348493	0.861632	0.838226
KCNA2	1	111172846	111174846	-	2.96631	3.13644	0.939963	1.07107
AL365361.1	1	111194403	111196403	-	0.872444	1.04548	0.469981	1.21077
KCNA3	1	111216405	111218405	-	8.02648	6.44712	3.99484	2.00243
Y_RNA	1	111305878	111307878	-	1.1051	0.813151	0.783302	1.21077
CD53	1	111415022	111417022	+	5.00201	5.80822	2.27158	1.72302
RP11-96K19.2	1	111485339	111487339	+	0.756118	1.16164	0.548311	0.931363
LRIF1	1	111505451	111507451	-	3.72243	3.42685	2.03659	1.76959
RN5S54	1	111583706	111585706	+	0.872444	0.348493	0.469981	0.791658
CEPT1	1	111681499	111683499	+	6.80506	6.50521	3.52486	2.46811
DRAM2	1	111681588	111683588	-	6.86322	6.67945	3.60319	2.51468
CHI3L2	1	111742643	111744643	+	2.73366	4.70466	1.01829	0.838226
DENND2D	1	111745907	111747907	-	13.7846	12.6038	5.87477	2.049
CHIA	1	111832734	111834734	+	0.465303	0.580822	0.704972	0.558818
RP5-1125M8.2	1	111865353	111867353	-	0.581629	0.580822	0.391651	0.838226
C1orf88	1	111888160	111890160	+	2.26835	2.26521	1.95826	0.838226
OVGP1	1	111969149	111971149	-	0.639792	0.406575	0.469981	0.651954
RP11-552M11.4	1	111982736	111984736	-	1.04693	0.464658	0.783302	0.931363
Y_RNA	1	111988670	111990670	+	1.33775	1.39397	0.783302	0.698522
ATP5F1	1	111990736	111992736	+	4.18773	6.73754	1.80159	1.58332
WDR77	1	111990748	111992748	-	4.18773	6.73754	1.80159	1.58332
C1orf162	1	112015664	112017664	+	1.97754	1.39397	1.09662	0.791658
U6	1	112031795	112033795	-	0.872444	0.580822	0.704972	0.651954
RAP1A	1	112084090	112086090	+	0.697955	0.755069	0.939963	0.698522
ADORA3	1	112105347	112107347	-	0.523466	0.987398	0.469981	0.651954
RP5-836N10.1	1	112150095	112152095	-	1.62856	1.21973	1.5666	0.558818
U6	1	112191909	112193909	-	1.04693	0.638904	0.626642	1.0245
RP4-773A18.4	1	112281713	112283713	+	3.6061	3.13644	4.1515	1.35048
DDX20	1	112297117	112299117	+	8.02648	8.8285	4.54315	2.28184
C1orf183	1	112297196	112299196	-	8.08465	8.94466	4.62148	2.28184
KCND3-IT1	1	112398277	112400277	-	0.523466	0.464658	0.704972	0.372545
KCND3-AS1	1	112451208	112453208	+	0.465303	0.290411	0.234991	0.838226
KCND3	1	112530527	112532527	-	1.45407	0.638904	1.09662	1.07107
RP11-88H9.2	1	112531642	112533642	+	1.91938	1.04548	1.48827	1.49018
RP11-88H9.1	1	112532408	112534408	+	0.98877	0.813151	1.33161	1.07107
snoU13	1	112737374	112739374	+	0.348977	0.406575	0.469981	0.512249
RP5-965F6.2	1	112901900	112903900	-	0.523466	0.929315	0.783302	0.791658
snoU13	1	112912876	112914876	+	0.523466	0.696986	0.626642	0.698522
CTTNBP2NL	1	112938053	112940053	+	2.44284	2.32329	1.17495	1.25734
RP4-671G15.2	1	112956589	112958589	+	0.581629	0.696986	0.548311	1.0245
RP4-671G15.3	1	112998690	113000690	+	0.465303	0.580822	0.234991	0.512249
WNT2B	1	113008413	113010413	+	1.51224	1.68438	1.09662	1.0245
CAPZA1	1	113161045	113163045	+	6.57241	9.52548	3.28987	1.86273
ST7L	1	113162197	113164197	-	4.47854	5.11123	1.64493	1.62988
RNU7-70P	1	113176156	113178156	-	1.80305	1.45206	0.783302	1.25734
snoU13	1	113194460	113196460	+	1.1051	0.871233	0.939963	0.838226
MOV10	1	113215013	113217013	+	1.1051	1.16164	1.25328	1.49018
RP11-426L16.3	1	113237993	113239993	-	0.523466	0.638904	0.548311	0.512249
RHOC	1	113248806	113250806	-	3.89692	2.20712	2.97655	1.35048
PPM1J	1	113256849	113258849	-	3.02447	2.09096	3.05488	1.67645
FAM19A3	1	113262291	113264291	+	0.290815	0.52274	0.548311	0.791658
RP3-522D1.1	1	113391900	113393900	+	0.814281	0.580822	1.48827	0.512249
RP11-426L16.8	1	113392015	113394015	-	0.872444	0.580822	1.40994	0.512249
RP11-31F15.1	1	113498287	113500287	+	5.99078	6.56329	3.91651	2.049
SLC16A1	1	113498385	113500385	-	6.10711	6.38904	4.30816	2.049
RP11-389O22.1	1	113550126	113552126	+	0.756118	1.27781	0.783302	0.558818
RP11-31F15.2	1	113614477	113616477	-	3.1408	3.13644	1.25328	1.53675
LRIG2	1	113615081	113617081	+	3.43161	3.36877	1.25328	1.44361
MAGI3	1	113932621	113934621	+	3.54794	2.43945	4.30816	2.049
PHTF1	1	114300861	114302861	-	7.67751	7.43452	3.05488	1.67645
RSBN1	1	114353848	114355848	-	5.75813	4.93699	2.89822	1.35048
RP5-1073O3.2	1	114354251	114356251	+	5.06017	4.24	3.05488	1.44361
RP5-1073O3.5	1	114398507	114400507	+	1.62856	1.39397	1.01829	0.884795
PTPN22	1	114413131	114415131	-	3.43161	4.35617	1.40994	1.72302
BCL2L15	1	114428919	114430919	-	0.872444	1.16164	0.783302	0.605386
AP4B1	1	114446573	114448573	-	4.12957	5.11123	2.27158	1.62988
DCLRE1B	1	114447013	114449013	+	3.66426	4.29808	2.03659	1.35048
RP5-1073O3.7	1	114470864	114472864	-	13.4938	11.9069	5.01313	1.86273
HIPK1	1	114471064	114473064	+	13.552	12.023	5.16979	1.90929
OLFML3	1	114521313	114523313	+	1.22142	0.348493	0.626642	0.74509
SYT6	1	114695291	114697291	-	0.697955	1.16164	1.48827	0.977931
RP4-543J13.1	1	114748299	114750299	+	0.290815	0.232329	0.469981	0.74509
Y_RNA	1	115032596	115034596	+	0.465303	0.871233	0.704972	0.931363
TRIM33	1	115052531	115054531	-	10.5275	8.88658	4.46482	2.32841
BCAS2	1	115123010	115125010	-	3.08263	4.29808	1.80159	1.81616
DENND2C	1	115211793	115213793	-	0.98877	1.16164	1.80159	1.35048
AMPD1	1	115236989	115238989	-	0.756118	0.929315	0.704972	0.838226
AL096773.1	1	115239295	115241295	-	0.756118	0.638904	0.861632	0.791658
NRAS	1	115258265	115260265	-	3.25712	3.6011	2.11492	0.698522
Y_RNA	1	115269591	115271591	+	0.756118	0.813151	1.01829	0.977931
CSDE1	1	115300047	115302047	-	2.84998	3.42685	2.42824	1.72302
[truncated: 38,148 more rows]
